1 **Risk factors affecting polygenic score performance across diverse cohorts**

2 Daniel Hui<sup>1</sup>, Scott Dudek<sup>1</sup>, Krzysztof Kiryluk<sup>2</sup>, Theresa L. Walunas<sup>3</sup>, Iftikhar J. Kullo<sup>4</sup>, Wei-Qi  
3 Wei<sup>5</sup>, Hemant K. Tiwari<sup>6</sup>, Josh F. Peterson<sup>5</sup>, Wendy K. Chung<sup>7</sup>, Brittney Davis<sup>8</sup>, Atlas Khan<sup>2</sup>,  
4 Leah Kottyan<sup>9</sup>, Nita A. Limdi<sup>8</sup>, Qiping Feng<sup>10</sup>, Megan J. Puckelwartz<sup>11</sup>, Chunhua Weng<sup>12</sup>,  
5 Johanna L. Smith<sup>4</sup>, Elizabeth W. Karlson<sup>13</sup>, Regeneron Genetics Center<sup>14</sup>, Gail P. Jarvik<sup>15</sup>,  
6 Marylyn D. Ritchie<sup>1</sup>

7  
8 <sup>1</sup>Department of Genetics, Perelman School of Medicine, University of Pennsylvania,  
9 Philadelphia, PA.

10 <sup>2</sup>Division of Nephrology, Department of Medicine, Columbia University, NY, New York.

11 <sup>3</sup>Department of Preventive Medicine, Northwestern University Feinberg School of Medicine,  
12 Chicago, Illinois, USA.

13 <sup>4</sup>Department of Cardiovascular Medicine, Mayo Clinic, Rochester, MN.

14 <sup>5</sup>Department of Biomedical Informatics, Vanderbilt University Medical Center, Nashville, TN.

15 <sup>6</sup>Department of Pediatrics, University of Alabama at Birmingham, Birmingham, AL.

16 <sup>7</sup>Departments of Pediatrics and Medicine, Columbia University Irving Medical Center, Columbia  
17 University, New York, NY.

18 <sup>8</sup>Department of Neurology, School of Medicine, University of Alabama at Birmingham,  
19 Birmingham, AL.

20 <sup>9</sup>The Center for Autoimmune Genomics and Etiology, Division of Human Genetics, Cincinnati  
21 Children's Hospital Medical Center, Cincinnati, OH.

22 <sup>10</sup>Division of Clinical Pharmacology, Department of Medicine, Vanderbilt University Medical  
23 Center, Nashville, TN, USA.

24 <sup>11</sup>Center for Genetic Medicine, Northwestern University Feinberg School of Medicine, Chicago,  
25 IL.

26 <sup>12</sup>Department of Biomedical Informatics, Vagelos College of Physicians & Surgeons, Columbia  
27 University, New York, NY.

28 <sup>13</sup>Division of Rheumatology, Inflammation, and Immunity, Department of Medicine, Brigham  
29 and Women's Hospital and Harvard Medical School, Boston, MA.

30 <sup>14</sup>Regeneron Pharmaceuticals Inc., Tarrytown, NY.

31 <sup>15</sup>Departments of Medicine (Medical Genetics) and Genome Sciences, University of Washington  
32 Medical Center, Seattle, WA.

33

34 Correspondence to:

35 Marylyn D. Ritchie, PhD

36 [marylyn@pennmedicine.upenn.edu](mailto:marylyn@pennmedicine.upenn.edu)

37

38

39

40

41

42

43

44

45

46

47 **Abstract**

48 Apart from ancestry, personal or environmental covariates may contribute to differences in  
49 polygenic score (PGS) performance. We analyzed effects of covariate stratification and  
50 interaction on body mass index (BMI) PGS ( $PGS_{BMI}$ ) across four cohorts of European  
51 ( $N=491,111$ ) and African ( $N=21,612$ ) ancestry. Stratifying on binary covariates and quintiles for  
52 continuous covariates, 18/62 covariates had significant and replicable  $R^2$  differences among  
53 strata. Covariates with the largest differences included age, sex, blood lipids, physical activity,  
54 and alcohol consumption, with  $R^2$  being nearly double between best and worst performing  
55 quintiles for certain covariates. 28 covariates had significant  $PGS_{BMI}$ -covariate interaction  
56 effects, modifying  $PGS_{BMI}$  effects by nearly 20% per standard deviation change. We observed  
57 overlap between covariates that had significant  $R^2$  differences among strata and interaction  
58 effects – across all covariates, their main effects on BMI were correlated with their maximum  $R^2$   
59 differences and interaction effects (0.56 and 0.58, respectively), suggesting high- $PGS_{BMI}$   
60 individuals have highest  $R^2$  and increase in PGS effect. Using quantile regression, we show the  
61 effect of  $PGS_{BMI}$  increases as BMI itself increases, and that these differences in effects are  
62 directly related to differences in  $R^2$  when stratifying by different covariates. Given significant  
63 and replicable evidence for context-specific  $PGS_{BMI}$  performance and effects, we investigated  
64 ways to increase model performance taking into account non-linear effects. Machine learning  
65 models (neural networks) increased relative model  $R^2$  (mean 23%) across datasets. Finally,  
66 creating  $PGS_{BMI}$  directly from GxAge GWAS effects increased relative  $R^2$  by 7.8%. These  
67 results demonstrate that certain covariates, especially those most associated with BMI,  
68 significantly affect both  $PGS_{BMI}$  performance and effects across diverse cohorts and ancestries,  
69 and we provide avenues to improve model performance that consider these effects.

70  
71  
72  
73  
74  
75  
76  
77  
78  
79  
80  
81  
82  
83  
84  
85  
86  
87  
88  
89  
90  
91  
92

## 93 Introduction

94 Polygenic scores (PGS) provide individualized genetic predictors of a phenotype by aggregating  
95 genetic effects across hundreds or thousands of loci, typically estimated from genome-wide  
96 association studies (GWAS). In recent years it has become increasingly apparent that the  
97 transferability of PGS performance across different cohorts is poor (1). Most analyses to date  
98 have focused on ancestry differences as the main driver of this lack of portability (2–4).  
99 However, a growing body of evidence has demonstrated that PGS performance and effect  
100 estimates are influenced by differences in certain contexts i.e., environmental (classically termed  
101 “gene-environment” effects or interactions) or personal-level covariates – different phenotypes  
102 seem to be differently affected by these covariates, with adiposity traits such as body mass index  
103 (BMI) having substantial evidence for these effects (5–14). In one previous study, they showed  
104 that GWAS stratified by sample characteristics had better PGS performance in cohorts that  
105 matched the sample characteristics of the stratified GWAS, and that differences in heritability  
106 between the stratified cohorts partially explained this observation (13).

107 There are several gaps in current knowledge about these covariate-specific effects. Many  
108 analyses have assessed only a handful of these covariates due to the myriad of choices possible  
109 in typical large-scale biobanks. Little investigation has been done to systematically understand  
110 why certain covariates affect PGS performance, with such knowledge being useful to reduce the  
111 potential search for variables that impart context-specific effects. Furthermore, most studies  
112 investigating PGS-covariate interactions have been in European ancestry individuals; notably,  
113 comparing differences in PGS performance and prediction while controlling for differences in  
114 ancestry versus differences in context has not been assessed in previous studies. Moreover,  
115 covariate-specific effects are notorious for replicating poorly in human genetics studies, and  
116 previous studies of PGS-covariate interactions have been predominantly performed in the UK  
117 Biobank (UKBB) (15), where the majority of individuals are aged 40-69 (i.e., excluding young  
118 adults), are overall healthier than those from other e.g., hospital-based cohorts, and are  
119 predominantly European ancestry. Additionally, PGS performance is often assessed using linear  
120 models and in isolation of clinical covariates, which in practice would often be available.  
121 Machine learning models can have increased performance over linear models and are capable of  
122 modeling complex relationships and interactions between variables, which may serve to increase  
123 predictive performance, especially given evidence for PGS-covariate specific effects. Finally,  
124 given evidence for context-specific effects, it should be possible to directly incorporate SNP-  
125 covariate interaction effects from a GWAS directly to improve prediction performance, instead  
126 of relying on post-hoc interactions from a typical PGS calculated from main GWAS effects.

127 Using genetic data with linked-phenotypic information from electronic health records, we  
128 estimated the effects of covariate stratification and interaction on performance and effect  
129 estimates of PGS for BMI ( $PGS_{BMI}$ ) – a flowchart summarizing our analyses is presented in  
130 Figure 1. These analyses were done across four datasets (Supplemental Table 1): UK Biobank  
131 (UKBB), Penn Medicine BioBank (PMBB) (15), Electronic Medical Records and Genomics  
132 (eMERGE) network dataset (16), and Genetic Epidemiology Research on Adult Health and  
133 Aging (GERA). These datasets include participants from two ancestry groups (N=491,111  
134 European ancestry (EUR), N=21,612 African ancestry (AFR)), and 62 covariates (25 present in  
135 multiple datasets) representing laboratory, survey, and biometric data types typically associated  
136 with cardiometabolic health and adiposity. After constructing  $PGS_{BMI}$  using out-of-sample multi-  
137 ancestry BMI GWAS, we assessed effects of covariate stratification on  $PGS_{BMI} R^2$ , the  
138 significance of  $PGS_{BMI}$ -covariate interaction terms and their increases to model  $R^2$  over models

139 only using main effects, as well as correlation of main effect, interaction effect, and  $R^2$   
140 differences. We then assessed ways to increase model performance through using machine  
141 learning models, and creating  $PGS_{BMI}$  using GxAge GWAS effects. This study addresses a  
142 plethora of open issues considering performance and effects of PGS on individuals from diverse  
143 backgrounds.

144

## 145 **Results**

### 146 Effect of covariate stratification on $PGS_{BMI}$ performance

147 We assessed 62 covariates for  $PGS_{BMI}$   $R^2$  differences (25 present, or suitable proxies, in multiple  
148 datasets (Supplemental Table 2) after stratifying on binary covariates and quintiles for  
149 continuous covariates. With UKBB EUR as discovery ( $N=376,729$ ), 18 covariates had  
150 significant differences (Bonferroni  $p<.05/62$ ) in  $R^2$  among groups (Figure 2a), including age, sex,  
151 alcohol consumption, different physical activity measurements, Townsend deprivation index,  
152 different dietary measurements, lipids, blood pressure, and HbA1c, with 40 covariates having  
153 suggestive ( $p<.05$ ) evidence of  $R^2$  differences. From an original  $PGS_{BMI}$   $R^2$  of 0.076,  $R^2$   
154 increased to 0.094-0.088 for those in the bottom physical activity, alcohol intake, and high-  
155 density lipoprotein (HDL) cholesterol quintiles, and decreased to 0.067-0.049 for those in the top  
156 quintile, respectively, comparable to differences observed between ancestries (1). We note that  
157 the differences in  $R^2$  due to alcohol intake and HDL were larger than those of any physical  
158 activity phenotype, despite physical activity having one of the oldest and most replicable  
159 evidence of interaction with genetic effects of BMI (17,18). Despite considerable published  
160 evidence suggesting covariate-specific genetic effects between BMI and smoking behaviors  
161 (6,8), we were only able to find suggestive evidence for  $R^2$  differences when stratifying  
162 individuals across several smoking phenotypes (minimum  $p=0.016$ , for smoking pack years).  $R^2$   
163 differences due to educational attainment were also only suggestive ( $p=0.015$ ), with published  
164 evidence on this association being conflicting (19–21).

165 We replicated these analyses in three additional large-scale cohorts of European and  
166 African ancestry individuals (Figure 2b, Supplemental Table 3), as well as in African ancestry  
167 UKBB individuals. Among covariates with significant performance differences in the discovery  
168 analysis, we were able to replicate significant ( $p<.05$ )  $R^2$  differences for age, HDL cholesterol,  
169 alcohol intake frequency, physical activity, and HbA1c, despite much smaller sample sizes. We  
170 again observed mostly insignificant differences across cohorts and ancestries when stratifying  
171 due to different smoking phenotypes and educational attainment. For each covariate and ancestry  
172 combination, we combined data across cohorts and conducted a linear regression weighted by  
173 sample size, regressing  $R^2$  values on covariate values across groupings. Slopes of the regressions  
174 across cohorts had different signs between ancestries for the same covariate (triglyceride levels,  
175 HbA1c, diastolic blood pressure, and sex), although larger sample sizes may be needed to  
176 confirm these differences are statistically significant.

177 Several observations related to age-specific effects on  $PGS_{BMI}$  we considered noteworthy.  
178 First, in the weighted linear regression of all  $R^2$  values across ancestries, expected  $R^2$  for African  
179 ancestry individuals can become greater than that of European ancestry individuals among  
180 individuals within bottom and top age quintiles observed in these data. For instance, the  
181 predicted  $R^2$  of 0.048 for 80 year-old European ancestry individuals would be lower than that of  
182 African ancestry individuals aged 24.7 and lower, indicating that differences in covariates can  
183 affect  $PGS_{BMI}$  performance more than differences due to ancestry. Second, we obtained these  
184 results despite the average age of GWAS individuals being 57.8, which should increase  $PGS_{BMI}$

185  $R^2$  for individuals closest to this age (13). This result suggests that PGS performance due to  
186 decreased heritability with age cannot be fully reconciled using GWAS from individuals of  
187 similar age being used to create  $PGS_{BMI}$  (as heritability is an upper bound on PGS performance).  
188 Finally, we observed that  $PGS_{BMI}$   $R^2$  increases as age decreases, consistent with published  
189 evidence suggesting that the heritability of BMI decreases with age (22,23).

190

#### 191 PGS-covariate interaction effects

192 Next, we estimated difference in PGS effects due to interactions with covariates, by modeling  
193 interaction terms between  $PGS_{BMI}$  and the covariate for each covariate in our list (described in  
194 Methods). We implemented a correction for shared heritability between covariates of interest and  
195 outcome (which can inflate test statistics (24)) to better measure the environmental component of  
196 each covariate, and show that this correction successfully reduces significance of interaction  
197 estimates (Supplemental Figure 1). Again, using UKBB EUR as the discovery cohort, we  
198 observed 28 covariates with significant (Bonferroni  $p < .05/62$ ) PGS-covariate interactions (Table  
199 1), with 38 having suggestive ( $p < .05$ ) evidence (Supplemental Table 4). We observed the largest  
200 effect of PGS-covariate interaction with alcohol drinking frequency (20.0% decrease in PGS  
201 effect per 1 standard deviation (SD) increase,  $p = 2.62 \times 10^{-55}$ ), with large effects for different  
202 physical activity measures (9.4%-12.5% decrease/SD, minimum  $p = 3.11 \times 10^{-66}$ ), HDL cholesterol  
203 (15.3% decrease/SD,  $p = 1.71 \times 10^{-96}$ ) and total cholesterol (12.7% decrease/SD,  $p = 1.64 \times 10^{-71}$ ). We  
204 observed significant interactions with diastolic blood pressure (10.8% increase/SD,  $p = 6.06 \times 10^{-60}$ ),  
205 but interactions with systolic blood pressure were much smaller (1.17% increase/SD,  
206  $p = 4.41 \times 10^{-3}$ ). Significant interactions with HbA1c (4.63% increase/SD,  $p = 5.37 \times 10^{-14}$ ) and type 2  
207 diabetes (27.2% PGS effect increase in cases,  $p = 1.83 \times 10^{-7}$ ) were also observed. Other significant  
208 PGS-covariate interactions included lung function, age, sex, and LDL cholesterol – various  
209 dietary measurements also had significant interactions, albeit with smaller effects than other  
210 significant covariates. We were able to find significant interaction effects for smoking pack years  
211 (4.78% increase/SD,  $p = 3.68 \times 10^{-7}$ ), but other smoking phenotypes had insignificant interaction  
212 effects after correcting for multiple tests (minimum  $p = 2.7 \times 10^{-3}$ ); interactions with educational  
213 attainment were also insignificant ( $p = 4.54 \times 10^{-2}$ ).

214 We replicated these analyses across ancestries and the other non-UKBB EUR cohorts  
215 (Figure 3, Supplemental Table 4). For age and sex, which were available for all cohorts,  
216 interactions were significant ( $p < .05$ ) and directionally consistent across cohorts and ancestries  
217 (except for GERA AFR which had small sample size ( $N = 1,789$ )). We were able to test  
218 interactions with alcohol intake frequency and physical activity in GERA, and replicated  
219 significant and directionally consistent associations. We observed poor replication for LDL  
220 cholesterol, HbA1c, and smoking pack years, with insignificant and directionally inconsistent  
221 interaction effects across cohorts. Educational attainment was available in GERA, and  
222 interactions were once again insignificant. We observed significant and directionally consistent  
223 interaction effects for TG in eMERGE EUR and PMBB EUR, while the effect was inconsistent  
224 in UKBB EUR despite much larger sample size.

225 However, despite significance of interaction terms, increases in model  $R^2$  when including  
226 PGS-covariate interaction terms were small. For instance, the maximum increase among all  
227 covariates in UKBB EUR was only 0.0024 from a base  $R^2$  of 0.1049 (2.1% relative increase), for  
228 alcoholic drinks per week. Across all cohorts and ancestries, the maximum increase in  $R^2$  was  
229 only 0.0058 from a base  $R^2$  of 0.09454 (6.1% relative increase), when adding a PGS-age  
230 interaction term for eMERGE EUR ( $p = 5.40 \times 10^{-46}$ ) – this was also the largest relative increase



231 among models with significant interaction terms. This result suggests that, while interaction  
232 effects can significantly modify  $\text{PGS}_{\text{BMI}}$  effect, their overall impact on model performance is  
233 relatively small, despite large differences in  $R^2$  when stratifying by covariates.

#### 234 235 Correlations between $R^2$ differences, interaction effects, and main effects

236 We next investigated the relationship between interaction effects, maximum  $R^2$  differences  
237 across quintiles, and main effects of covariates on BMI. We first estimated main effects of each  
238 covariate on BMI (Methods, Supplemental Table 5), and then calculated the correlation weighted  
239 by sample size between main effects, maximum  $\text{PGS}_{\text{BMI}}$   $R^2$  across quintiles, and PGS-covariate  
240 interaction effects (Figure 4) across all cohorts and ancestries – GERA data were excluded from  
241 these analyses due to slightly different phenotype definition (Supplemental Table 6), as were  
242 binary variables. Interaction effects and maximum  $R^2$  differences had a 0.80 correlation  
243 ( $p=2.1 \times 10^{-27}$ ), indicating that variables with larger interaction effects also had larger effects on  
244  $\text{PGS}_{\text{BMI}}$  performance across quintiles, and that covariates that increase  $\text{PGS}_{\text{BMI}}$  effect also have  
245 the largest effect on  $\text{PGS}_{\text{BMI}}$  performance i.e., individuals most at risk for obesity will have both  
246 disproportionately larger  $\text{PGS}_{\text{BMI}}$  effect and  $R^2$ . Main effects and maximum  $R^2$  differences had a  
247 0.56 correlation ( $p=1.3 \times 10^{-11}$ ), while main effects and interaction effects had a 0.58 correlation  
248 ( $p=7.6 \times 10^{-12}$ ) again suggesting that  $\text{PGS}_{\text{BMI}}$  are more predictive in individuals with higher values  
249 of BMI-associated covariates, although less predictive than estimating the interaction effects  
250 themselves directly. However, this result demonstrates that covariates that influence both  $\text{PGS}_{\text{BMI}}$   
251 effect and performance can be predicted just using main effects of covariates, which are often  
252 known for certain phenotypes and easier to calculate, as genetic data and PGS construction  
253 would not be required.

#### 254 255 Increase in PGS effect for increasing percentiles of BMI itself, and its relation to $R^2$ differences 256 when stratifying by covariates

257 Given large and replicable correlations between main effects, interaction effects, and maximum  
258  $R^2$  differences for individual covariates, it seemed these differences may be due to the  
259 differences in BMI itself, rather than any individual or combination of covariates. To assess this,  
260 we used quantile regression to evaluate the effect of  $\text{PGS}_{\text{BMI}}$  on BMI at different deciles of BMI  
261 itself. We observed that the effect of  $\text{PGS}_{\text{BMI}}$  consistently increases from lower deciles to higher  
262 deciles across all cohorts and ancestries (Figure 5) – for instance, in European ancestry UKBB  
263 individuals, the effect of  $\text{PGS}_{\text{BMI}}$  (in units of  $\log(\text{BMI})$ ) when predicting the bottom decile of  
264  $\log(\text{BMI})$  was 0.716 (95% CI: 0.701-.732), and increased to 1.31 (95% CI: 1.29-1.33) in the top  
265 decile. Across all cohorts and ancestries, the effect of  $\text{PGS}_{\text{BMI}}$  between lowest and highest effect  
266 decile ranged from 1.43-2.06 times larger, with all cohorts and ancestries having non-  
267 overlapping 95% confidence intervals between their effects (except for African ancestry  
268 eMERGE individuals, which had much smaller sample size).

269 While this analysis showed that the effect of  $\text{PGS}_{\text{BMI}}$  increases as BMI itself increases,  
270 which may help explain significant interaction effects between  $\text{PGS}_{\text{BMI}}$  and different covariates,  
271 it does not directly explain differences in  $R^2$  when stratifying by different covariates – we  
272 describe several points that help explain this result and suggest they may actually be closely  
273 related. Essentially, as the magnitude of the slope of a regression line increases while the mean  
274 squared residual does not increase, model  $R^2$  will increase – we demonstrate this using simulated  
275 data (Supplemental Figure 2). As the magnitude of the regression line's slope decreases, the  
276 regression line becomes a comparatively worse predictor compared to just using the mean, which

277 decreases  $R^2$  despite the mean error being the same across models. To demonstrate this in real  
278 data, we compared simple univariable models of  $\log(\text{BMI}) \sim \text{PGS}_{\text{BMI}}$  (in units of  $\log(\text{BMI})$ )  
279 between the bottom and top age quintiles in the European ancestry UKBB (Supplemental Figure  
280 3). As shown in previous sections,  $R^2$  and  $\text{PGS}_{\text{BMI}}$  beta are higher in younger individuals ( $R^2 =$   
281  $0.088$  versus  $R^2 = 0.066$ , and  $\text{beta}=1.12$  and  $0.87$ , respectively), which seem to be a direct  
282 consequence of one another, as the mean squared error in younger individuals is actually higher  
283 ( $0.027$  versus  $0.022$ , respectively). This description suggests that the use of  $R^2$  as the sole  
284 performance metric for evaluation of PGS may not always be appropriate, despite its  
285 overwhelming usage. Furthermore, this explanation helps explain the seemingly paradoxical  
286 results of significant interaction terms yet small increases in overall model  $R^2$ , and comparably  
287 much larger differences in  $R^2$  in the stratified analyses.

288

### 289 Effects of machine learning approaches on predictive performance

290 Given evidence of PGS-covariate dependence, we aimed to assess increases in  $R^2$  when using  
291 machine learning models (neural networks), which can inherently model interactions and other  
292 nonlinearities, over linear models even with interaction terms. We first included age and sex as  
293 the only covariates (along with genotype PCs and  $\text{PGS}_{\text{BMI}}$ ), as age and sex were present in all  
294 datasets and had significant and replicable evidence for PGS-dependence across our analyses.  
295 Three models were assessed – L1-regularized (i.e., LASSO) linear regression without any  
296 interaction terms, LASSO including a PGS-age and PGS-sex interaction term, and neural  
297 networks (without interaction terms). When comparing neural networks to LASSO with  
298 interaction terms, the relative 10-fold cross-validated  $R^2$  increased up to 67% (mean 23%) across  
299 cohorts and ancestries (Figure 6, Supplemental Table 7). The inclusion of interaction terms  
300 increased cross-validated  $R^2$  up to 12% (mean 3.9%) when comparing LASSO including  
301 interaction terms to LASSO with main effects only.

302 We then modeled all available covariates and their interactions with PGS for each cohort  
303 and did similar comparisons. Cross-validated  $R^2$  increased by up to 17.6% (mean 9.5%) when  
304 using neural networks versus LASSO with interaction terms, and up to 7.0% (mean 2.0%) when  
305 comparing LASSO with interaction terms to LASSO with main effects only. Increases in model  
306 performance using neural networks were smaller in UKBB, perhaps due to the age range being  
307 smaller than other cohorts (all participants aged 39-73). This result suggests that additional  
308 variance explained through non-linear effects with age and sex are explained by other variables  
309 present in the remainder of the datasets. Our findings show machine learning methods can  
310 improve model  $R^2$  that include  $\text{PGS}_{\text{BMI}}$  as variables beyond including interaction terms in linear  
311 models, even when variable selection is performed using LASSO, demonstrating that model  
312 performance can be increased beyond modeling nonlinearities through linear interaction terms  
313 and a feature selection procedure.

314

### 315 Calculating PGS directly from GxAge GWAS effects

316 Previous studies (13) have created PGS using GWAS stratified by different personal-level  
317 covariates, but for practical purposes this leads to a large loss of power as the full size of the  
318 GWAS is not utilized for each strata and continuous variables are forced into bins. We developed  
319 a novel strategy where PGS are instead created from a full-size GWAS that includes SNP-  
320 covariate interaction terms (Methods). We focused on age interactions, given their large and  
321 replicable effects based on our results – similar to a previous study (13), we conducted these  
322 analyses in the European UKBB. We used a 60% random split of study individuals to conduct

323 three sets of PGS using GWAS of the following designs: main effects only, main effects also  
324 with a SNP-age interaction term, and main effects but stratified into quartiles by age. 20% of the  
325 remaining data were used for training and the final 20% were held-out as a test set. The best  
326 performing PGS created from SNP-age interaction terms ( $PGS_{G \times Age}$ ) increased test  $R^2$  to 0.0771  
327 (95% bootstrap CI: 0.0770-0.0772) from 0.0715 (95% bootstrap CI: 0.0714-0.0716), a 7.8%  
328 relative increase compared to the best performing main effect PGS (Figure 7, Supplemental  
329 Table 8 – age-stratified PGS had much lower performance than both other strategies  
330 (unsurprising given reasons previously mentioned). Including a  $PGS_{G \times Age}$ -age interaction term  
331 only marginally increased  $R^2$  (0.0001 increase), with similar increases for the other two sets of  
332 PGS, further demonstrating that post-hoc modeling of interactions cannot reconcile performance  
333 gained through directly incorporating interaction effects from the original GWAS. The strategy  
334 of creating PGS directly from full-sized SNP-covariate interactions is potentially quite useful as  
335 it increases PGS performance without the need for additional data – there are almost certainly a  
336 variety of points of improvement (described more in Discussion), but we consider their  
337 investigation outside the scope of this study.

338

### 339 Discussion

340 We uncovered replicable effects of covariates across four large-scale cohorts of diverse ancestry,  
341 on both performance and effects of  $PGS_{BMI}$ . When stratifying by quintiles of different covariates,  
342 certain covariates had significant and replicable evidence for differences in  $PGS_{BMI} R^2$ , with  $R^2$   
343 being nearly double between top and bottom performing quintiles for covariates with the largest  
344 differences. When testing PGS-covariate interaction effects, we also found covariates with  
345 significant interaction effects, where, for the largest effect covariates, each standard deviation  
346 change affected  $PGS_{BMI}$  effect by nearly 20%. Across analyses, we found age and sex had the  
347 most replicable interaction effects, with levels of serum cholesterol, physical activity, and  
348 alcohol consumption having the largest effects across cohorts. Interaction effects and  $R^2$   
349 differences were strongly correlated, with main effects also being correlated with interaction  
350 effects and  $R^2$  differences, suggesting that covariates with the largest interaction effects also  
351 contribute to the largest  $R^2$  differences, with simple main effects also being predictive of  
352 expected differences in  $R^2$  and interaction effects. Relatedly, we observed the effect of  $PGS_{BMI}$   
353 increases as BMI itself increases, and reason that differences in  $R^2$  when stratifying by covariates  
354 are largely a consequence of difference in  $PGS_{BMI}$  effects. Next, we employed machine learning  
355 methods for prediction of BMI with models that include  $PGS_{BMI}$  and demonstrate that these  
356 methods outperform regularized linear regression models that include interaction effects. Finally,  
357 we employed a novel strategy that directly incorporates SNP interaction effects into PGS  
358 construction, and demonstrate that this strategy improves PGS performance when modeling  
359 SNP-age interactions compared to PGS created only from main effects.

360 These observations are relevant to current research and clinical use of PGS, as individuals  
361 above a percentile cutoff are designated high-risk (40), implying that individuals most at-risk for  
362 obesity have both disproportionately higher predicted BMI and increased BMI prediction  
363 performance compared to the general population. More broadly, these results may likely extend  
364 to single variant effects instead of those aggregated into a PGS, which may inform the cause of  
365 previous GxE discoveries – for instance, variants near *FTO* that interact with physical activity  
366 discovered through GWAS of BMI are robust and well-documented. However, individuals  
367 engaging in physical activity will generally have lower BMI than those that are sedentary, and  
368 these results suggest it may not be the difference in physical activity that's driving the



369 interaction, rather the difference in BMI itself. This concept may also apply to other traits – for  
370 instance, sex-specific analyses are commonly performed, and variants with differing effects  
371 between males and females GWAS may largely be explained by phenotypic differences, rather  
372 than any combination of biological or lifestyle differences.

373 Future work may include replicating these analyses across additional traits, and trying to  
374 understand why these differences occur, as well as further exploring machine learning and deep  
375 learning methods on other phenotypes to determine if this trend of inclusion of PGS along with  
376 covariate interaction effects outperforms linear models for risk prediction. Additionally,  
377 inclusion of a PGS for the covariate to better measure its environmental effect is potentially  
378 worth exploring further, and should improve in the future as PGS performance continues to  
379 increase. A slight limitation of this method in our study is that for the UKBB analyses the  
380 GWAS used for PGS construction were also from UKBB thus not out-of-sample, although many  
381 of the covariates only have GWAS available through UKBB individuals. Furthermore, a variety  
382 of improvements are likely possible when creating PGS directly from SNP-covariate interaction  
383 terms. First, we used the same SNPs that were selected by pruning and thresholding based on  
384 their main effect p-values, but selection of SNPs based on their interaction p-values should also  
385 be possible and would likely improve performance. Additionally, performance of pruning and  
386 thresholding-based strategies have largely been overtaken by methods that first adjust all SNP  
387 effects for LD and don't require exclusion of SNPs, and a method that could do a similar  
388 adjustment for interaction effects would likely outperform most current methods for traits with  
389 significant context-specific effects. Next, incorporating additional SNP-covariate interactions  
390 (e.g., SNP-sex) would also likely further improve prediction performance, although any SNP  
391 selection/adjustment procedures may be further complicated by additional interaction terms.  
392 Finally, if SNP effects do truly differ according to differences in phenotype, then SNP effects  
393 would differ depending on the alleles one has, implying epistatic interactions are occurring at  
394 these SNPs.

395 While difference in phenotype itself may be able to explain difference in genetic effects,  
396 it still may be that specific environmental or lifestyle characteristics are driving the differences.  
397 We propose several ideas about why BMI-associated covariates have larger interaction effects  
398 and impact on  $R^2$  for  $PGS_{BMI}$ . First, age may be a proxy for accumulated gene-environment  
399 interactions as younger individuals have less exposure to environmental influences on weight  
400 compared to older individuals; therefore, one may expect that in younger individuals their  
401 phenotype could be better explained by genetics compared to environment. Second, PGS may  
402 more readily explain high phenotype values especially for positively skewed phenotypes, as  
403 large effect variants (e.g., associated with very high weight or height (25)) may be more  
404 responsible for extremely high phenotypic values. For example, the distribution of BMI is often  
405 positively skewed, and effects in trait-increasing alleles may have a larger potential to explain  
406 trait variation compared to trait-reducing variants. This explanation would likely be better suited  
407 to positively skewed traits and is not fully satisfactory as first log-transforming or rank-normal  
408 transforming the phenotype, as was done in this study, may invalidate this explanation.

409 PGS is a promising technique to stratify individuals for their risk of common, complex  
410 disease. To achieve more accurate predictions as well as promote equity, further research is  
411 required regarding PGS methods and assessments. This research provides firm evidence  
412 supporting the context-specific nature of PGS and the impact of nonlinear covariate effects for  
413 improving polygenic prediction of BMI, promoting equitable use of PGS across ancestries and  
414 cohorts.

415

## 416 **Methods**

### 417 Study datasets

418 Individual inclusion criteria and sample sizes per cohort are described below – additional  
419 information is available in Supplemental Table 1.

420

#### 421 *UKBB*

422 Individual-level quality-control and filtering have been described elsewhere (26) for European  
423 ancestry individuals. Briefly, individuals were split by ancestry according to both genetically  
424 inferred ancestry and self-reported ethnicity (15). Individuals with low genotyping quality and  
425 sex mismatch were removed, only unrelated individuals ( $\pi\text{-hat} < 0.250$ ) were retained, and  
426 variants were filtered at  $\text{INFO} > 0.30$  and minor allele frequency (MAF)  $> 0.01$ . For African  
427 ancestry, individuals were first selected based on self-reported ethnicity “Black or Black  
428 British”, “Caribbean”, “African”, or “Any other Black background”. Individuals that were low  
429 quality i.e., “Outliers for heterozygosity or missing rate”, and that were Caucasian from “Genetic  
430 ethnic grouping” were removed. Of these individuals, those that were  $\pm 6$  standard deviations  
431 from the mean of the first 5 genetic principal components provided by UKBB were excluded.  
432 Finally, only unrelated individuals were retained up to the second degree using plink2 (27) “-  
433 king-cutoff 0.125”. After QC and consideration of phenotype, a total of 7,046 individuals in the  
434 UKBB AFR data who also had BMI available were used for downstream analyses. In total,  
435 383,775 individuals were used for analysis ( $N_{\text{EUR}}=376,729$ ,  $N_{\text{AFR}}=7,046$ ).

436

#### 437 *eMERGE*

438 Ancestry and relatedness inference have been described elsewhere (15). Individuals were split  
439 into European and African ancestry cohorts, and related individuals were removed ( $\pi\text{-hat} >$   
440  $0.250$ ) such that all were unrelated. 35,064 individuals ( $N_{\text{EUR}}=31,961$ ,  $N_{\text{AFR}}=3,103$ ) were used  
441 for analysis.

442

#### 443 *GERA*

444 Ancestry inference has been described elsewhere (28), and study individuals were divided into  
445 European and African ancestry cohorts. Related individuals were removed using plink2 “-king-  
446 cutoff 0.125”. 57,838 individuals ( $N_{\text{EUR}}=56,049$ ,  $N_{\text{AFR}}=1,789$ ) were used for analysis.

447

#### 448 *PMBB*

449 Ancestry inference and relatedness inference have been described elsewhere (29). Individuals  
450 were split into European and African ancestry cohorts, and related individuals were removed at  
451  $\pi\text{-hat} > 0.250$ . 36,046 individuals ( $N_{\text{EUR}}=26,372$ ,  $N_{\text{AFR}}=9,674$ ) were used for analysis.

452

### 453 Choice of covariates

454 A total of 62 covariates were included in the analyses, 25 of which were present (or similar  
455 proxies) in multiple datasets. These covariates were selected based on relevance to  
456 cardiometabolic health and obesity, and previous evidence of context-specific effects with BMI  
457 (5,6,8,30–32). For UKBB, phenotype values were used from the collection that was closest to  
458 recruitment, and for PMBB the median values were used – for GERA and eMERGE only one  
459 value was available. Additional details on covariate constructions, transformations, filtering, and  
460 cohort availability are in Supplemental Table 2.

461  
462 PGS construction  
463 PGS for BMI ( $PGS_{BMI}$ ) were constructed using PRS-CSx (33), using GWAS summary statistics  
464 for individuals of European (34), African (35), and East Asian (36) ancestry that were out-of-  
465 sample of study participants. A set of 1.29 million HapMap3 SNPs provided by PRS-CSx was  
466 used for PGS calculation, which are generally well-imputed and variable frequency across global  
467 populations. Default settings for PRS-CSx (downloaded November 22, 2021) were used, which  
468 have been demonstrated to perform well for highly polygenic traits such as BMI (list of  
469 parameters in Supplemental Table 9). The final  $PGS_{BMI}$  per ancestry and cohort was calculated  
470 by regressing  $\log(BMI)$  on the  $PGS_{BMI}$  per ancestry without covariates – the combined, predicted  
471 value was used as a single  $PGS_{BMI}$  in downstream analyses.

472  
473 For GERA, BMI was not transformed, as it was already binned into a categorical variable with 5  
474 levels ( $18 \leq$ , 19-25, 26-29, 30-39,  $>40$ ). Additionally, for GERA the uncombined ancestry-  
475 specific  $PGS_{BMI}$  were used in the final models, as it had higher  $R^2$  than using the combined  
476  $PGS_{BMI}$  (data not shown).

#### 477 $PGS_{BMI}$ performance after covariate stratification

478 Analyses were performed separately for each cohort and ancestry. For each covariate, individuals  
479 were binned by binary covariates or quintiles for continuous covariates. Incremental  $PGS_{BMI}$   $R^2$   
480 was calculated by taking the difference in  $R^2$  between:  
481

$$482 \log(BMI) \sim PGS_{BMI} + Age + Sex + PCs_{1-5}$$

$$483 \log(BMI) \sim Age + Sex + PCs_{1-5}$$

484  
485  
486 We performed 5,000 bootstrap replications to obtain a bootstrapped distribution of  $R^2$ . P-values  
487 for differences in  $R^2$  were calculated between groups by calculating the proportion of overlap  
488 between two normal distributions of the  $R^2$  value using the standard deviations of the bootstrap  
489 distributions. Again for GERA, BMI was not transformed.

#### 490 $PGS_{BMI}$ interaction modelling

491 Evidence for interaction with each covariate with the  $PGS_{BMI}$  was evaluated using linear  
492 regression. It has been reported that the inclusion of covariates that are genetically correlated  
493 with the outcome can inflate test statistic estimates (24,37,38). To assuage these concerns, we  
494 introduced a novel correction, where we first calculated a PGS for the covariate ( $PGS_{Covariate}$ ) and  
495 included it in the model, as well as an interaction term between  $PGS_{BMI}$  and  $PGS_{Covariate}$ . The  
496  $PGS_{Covariate}$  terms were calculated using the European ancestry Neale Lab summary statistics  
497 (URLs) and PRS-CS (39). To standardize effect sizes across analyses,  $PGS_{BMI}$  and Covariate  
498 were first converted to mean zero and standard deviation of 1 (binary covariates were not  
499 standardized). We demonstrate inclusion of  $PGS_{Covariate}$  terms successfully reduced significance  
500 of the  $PGS_{BMI} * Covariate$  term (Supplemental Figure 1). The final model used to evaluate  
501  $PGS_{BMI}$  and Covariate interactions was:  
502

$$503 \log(BMI) \sim PGS_{BMI} * Covariate + PGS_{BMI} + Covariate + PGS_{Covariate} + PGS_{BMI} * PGS_{Covariate} + Age + Sex + PCs_{1-5}$$

504  
505  
506 We report the effect estimates of the  $PGS_{BMI} * Covariate$  term, and differences in model  $R^2$  with  
507 and without the  $PGS_{BMI} * Covariate$  term. Again for GERA, BMI was not transformed.

508

### 509 Correlation between $R^2$ differences, interaction effects, and main effects

510 We estimated main effects of each covariate on BMI with the following model:

511

$$512 \log(\text{BMI}) \sim \text{Covariate} + \text{Age} + \text{Sex} + \text{PC}_{\text{S}_{1-5}}$$

513

514 Note that we ran new models with main effects only, instead of using the main effect from the  
515 interaction models (as the main effects in the interaction models depend on the interaction terms,  
516 and main effects used to create interaction terms are sensitive to centering of variables despite  
517 the scale invariance of linear regression itself (40)). We then estimated the correlation between  
518 main effects, interaction effects, and maximum  $R^2$  differences across all cohorts and ancestries  
519 weighting by sample size, analyzing quantitative and binary variables separately.

520

### 521 Quantile regression to measure PGS effect across percentiles of BMI

522 The effect of  $\text{PGS}_{\text{BMI}}$  on BMI at different deciles of BMI was assessed using quantile regression.

523 Tau – the parameter that sets which percentile to be predicted – was set to .10, .20, ..., .90.

524 Models included age, sex, and the top 5 genetic PCs as covariates. Analyses were stratified by  
525 ancestry and cohort, and BMI was first log transformed. GERA was excluded from these  
526 analyses, as a portion of the models failed to run (as BMI values from GERA were already  
527 binned, some deciles all had the same BMI value – additionally, difference in effects between  
528 bins would be harder to evaluate as BMI within each decile would be more homogeneous).

529

### 530 Machine learning models

531 UKBB EUR and GERA EUR models were restricted to 30,000 random individuals, for  
532 computational reasons – BMI distributions did not differ from the full-sized datasets  
533 (Kolmogorov-Smirnov p-value of 0.29 and 0.57, respectively).  $\text{PGS}_{\text{BMI}}$  and top five genetic  
534 principal components were included as features in all models. Two sets of models were  
535 evaluated for each cohort and ancestry: including age and sex as features, and including all  
536 available covariates in each cohort as features. Interactions terms between PGS and each  
537 covariate were included for models using interaction terms. ‘Ever Smoker’ status was used in  
538 favor of ‘Never’ vs ‘Current smoking’ status (if present), as individuals with ‘Never’ vs  
539 ‘Current’ status are a subset of those with ‘Ever Smoker’ status. UKBB AFR with all covariates  
540 was excluded due to small sample size (N=53).

541 Neural networks were used as the model of choice, given their inherent ability model  
542 interactions and other nonlinear dependencies. Prior to modeling, all features were scaled to be  
543 between 0 and 1. We used average 10-fold cross validation  $R^2$  to evaluate model performance.  
544 Separate models were trained using untransformed and  $\log(\text{BMI})$ . L1-regularized linear  
545 regression was used with 18 values of lambda ( $1.0$ ,  $5.0 \times 10^{-1}$ ,  $2.0 \times 10^{-1}$ ,  $1.0 \times 10^{-1}$ ,  $5.0 \times 10^{-2}$ ,  $2.0 \times 10^{-2}$ ,  
546  $1.0 \times 10^{-5}$ ,  $5.0 \times 10^{-6}$ ,  $2.0 \times 10^{-6}$ ). Models were trained without inclusion of interaction terms  
547 (which neural networks can implicitly model), using 1,000 iterations of random search with the  
548 following hyperparameter ranges: size of hidden layers [10, 200], learning rate [0.01, 0.0001],  
549 type of learning rate [constant, inverse scaling], power t [0.4, 0.6], momentum [0.80, 1.0], batch  
550 size [32, 256], and number of hidden layers [1, 2].

551

### 552 GxAge $\text{PGS}_{\text{BMI}}$ creation and assessment

553 Analyses were conducted in the European UKBB (N=376,629), as was done in a study on a  
554 similar topic (13). Three sets of analyses were performed, using GWAS conducted in a 60%



555 random split of individuals using the following models (BMI was rank-normal transformed  
556 before GWAS):

- 557
- 558 1)  $BMI \sim SNP + Age + Sex + PC_{S1-5}$
  - 559
  - 560 2)  $BMI \sim SNP + Age * SNP + Age + Sex + PC_{S1-5}$
  - 561
  - 562 3) Using the model in 1) but stratified into quartiles by age. BMI was rank-normal transformed  
563 within each quartile.

564

565 Using each set of GWAS, PGS was first calculated in a 20% randomly selected training set of  
566 the dataset using pruning and thresholding using 10 p-value thresholds ( $0.50, 0.10, \dots, 5.0 \times 10^{-5},$   
567  $1.0 \times 10^{-5}$ ) and remaining settings as default in Plink 1.9. For 2), GxAge PGS<sub>BMI</sub> were calculated  
568 using SNPs clumped by their main effect p-values from 1), and additionally incorporating the  
569 GxAge interaction effects per SNP. In other words, instead of typical PGS construction as:

570

$$571 PGS_i = \beta_1 k_1 + \beta_2 k_2 + \dots + \beta_n k_n$$

572

573 For an individual  $i$ 's PGS calculation, with main SNP effect  $\beta$ , and  $n$  SNPs, PGS incorporating  
574 GxAge effects (PGS<sub>GxAge</sub>) was calculated as:

575

$$576 PGS_{GxAge,i} = \beta_1 k_1 + \beta_{GxAge,1} k_1 Age_i + \beta_2 k_2 + \beta_{GxAge,2} k_2 Age_i \dots + \beta_n k_n + \beta_{GxAge,n} k_n Age_i$$

577

578 Where  $\beta_{GxAge}$  is the GxAge effect for each SNP  $n$  and  $Age_i$  is the age for individual  $i$ .

579

580 For each of the three analyses, the parameters and models resulting in the best performing PGS  
581 (highest incremental  $R^2$ , using same main effect covariates as in the three GWAS) from the  
582 training set were evaluated in the remaining 20% of the study individuals. For 3), models were  
583 first trained within each quartile separately. To maintain sense of scale across quartiles (after  
584 rank-normal transformation),  $R^2$  between all predicted values and true values was calculated  
585 together. For  $R^2$  confidence intervals, the training set was bootstrapped and evaluated on the test  
586 set 5,000 times.

## 587

## 588 **URLs**

589 Neale Lab UKBB summary statistics: <http://www.nealelab.is/uk-biobank>

## 590

## 591 **Data Availability statement**

592 UK Biobank data was accessed under project #32133. eMERGE data is available at dbGaP in  
593 phs001584.v2.p2. GERA data is available at dbGaP in phs000674.v3.p3. Summary statistics for  
594 PMBB are available from authors upon request.

## 595

## 596 **Regeneron Genetics Center Banner Author List and Contribution Statements**

### 597 RGCC Management and Leadership Team

598 Goncalo Abecasis, PhD, Aris Baras, M.D., Michael Cantor, M.D., Giovanni Coppola, M.D.,  
599 Andrew Deubler, Aris Economides, Ph.D., Luca A. Lotta, M.D., Ph.D., John D. Overton, Ph.D.,  
600 , Jeffrey G. Reid, Ph.D., Katherine Siminovitch, M.D., Alan Shuldiner, M.D.

601  
602  
603  
604  
605  
606  
607  
608  
609  
610  
611  
612  
613  
614  
615  
616  
617  
618  
619  
620  
621  
622  
623  
624  
625  
626  
627  
628  
629  
630  
631  
632  
633  
634  
635  
636  
637  
638  
639  
640  
641  
642  
643  
644  
645

### Sequencing and Lab Operations

Christina Beechert, Caitlin Forsythe, M.S., Erin D. Fuller, Zhenhua Gu, M.S., Michael Lattari, Alexander Lopez, M.S., John D. Overton, Ph.D., Maria Sotiropoulos Padilla, M.S., Manasi Pradhan, M.S., Kia Manoochehri, B.S., Thomas D. Schleicher, M.S., Louis Widom, Sarah E. Wolf, M.S., Ricardo H. Ulloa, B.S.

### Clinical Informatics

Amelia Averitt, Ph.D., Nilanjana Banerjee, Ph.D., Michael Cantor, M.D., Dadong Li, Ph.D., Sameer Malhotra, M.D., Deepika Sharma, MHI, Jeffrey Staples, Ph.D.

### Genome Informatics

Xiaodong Bai, Ph.D., Suganthi Balasubramanian, Ph.D., Suying Bao, Ph.D., Boris Boutkov, Ph.D., Siying Chen, Ph.D., Gisu Eom, B.S., Lukas Habegger, Ph.D., Alicia Hawes, B.S., Shareef Khalid, Olga Krasheninina, M.S., Rouel Lanche, B.S., Adam J. Mansfield, B.A., Evan K. Maxwell, Ph.D., George Mitra, B.A., Mona Nafde, M.S., Sean O’Keeffe, Ph.D., Max Orelus, B.B.A., Razvan Panea, Ph.D., Tommy Polanco, B.A., Ayesha Rasool, M.S., Jeffrey G. Reid, Ph.D., William Salerno, Ph.D., Jeffrey C. Staples, Ph.D., Kathie Sun, Ph.D.

### Analytical Genomics and Data Science

Goncalo Abecasis, D.Phil., Joshua Backman, Ph.D., Amy Damask, Ph.D., Lee Dobbyn, Ph.D., Manuel Allen Revez Ferreira, Ph.D., Arkopravo Ghosh, M.S., Christopher Gillies, Ph.D., Lauren Gurski, B.S., Eric Jorgenson, Ph.D., Hyun Min Kang, Ph.D., Michael Kessler, Ph.D., Jack Kosmicki, Ph.D., Alexander Li, Ph.D., Nan Lin, Ph.D., Daren Liu, M.S., Adam Locke, Ph.D., Jonathan Marchini, Ph.D., Anthony Marcketta, M.S., Joelle Mbatchou, Ph.D., Arden Moscati, Ph.D., Charles Paulding, Ph.D., Carlo Sidore, Ph.D., Eli Stahl, Ph.D., Kyoko Watanabe, Ph.D., Bin Ye, Ph.D., Blair Zhang, Ph.D., Andrey Ziyatdinov, Ph.D.

### Therapeutic Area Genetics

Ariane Ayer, B.S., Aysegul Guvenek, Ph.D., George Hindy, Ph.D., Giovanni Coppola, M.D., Jan Freudenberg, M.D., Jonas Bovijn M.D., Katherine Siminovitch, M.D., Kavita Praveen, Ph.D., Luca A. Lotta, M.D., Manav Kapoor, Ph.D., Mary Haas, Ph.D., Moeen Riaz, Ph.D., Niek Verweij, Ph.D., Olukayode Sosina, Ph.D., Parsa Akbari, Ph.D., Priyanka Nakka, Ph.D., Sahar Gelfman, Ph.D., Sujit Gokhale, B.E., Tanima De, Ph.D., Veera Rajagopal, Ph.D., Alan Shuldiner, M.D., Bin Ye, Ph.D., Gannie Tzoneva, Ph.D., Juan Rodriguez-Flores, Ph.D.

### Research Program Management & Strategic Initiatives

Esteban Chen, M.S., Marcus B. Jones, Ph.D., Michelle G. LeBlanc, Ph.D., Jason Mighty, Ph.D., Lyndon J. Mitnaul, Ph.D., Nirupama Nishtala, Ph.D., Nadia Rana, Ph.D., Jaimee Hernandez

### **Acknowledgements**

We acknowledge David Crosslin for helping clean the eMERGE data.

### **Funding**

646 M.D.R., S.D., and D.H. are funded by AI077505 and HL169458. W.K.C is funded by grant  
647 NIDDK DK52431. J.F.P. is funded by grant U01 HG011166. C.W. is funded by U01  
648 HG008680. This phase of the eMERGE Network was initiated and funded by the NHGRI  
649 through the following grants: U01HG008657 (Group Health Cooperative/University of  
650 Washington); U01HG008685 (Brigham and Women's Hospital); U01HG008672 (Vanderbilt  
651 University Medical Center); U01HG008666 (Cincinnati Children's Hospital Medical Center);  
652 U01HG006379 (Mayo Clinic); U01HG008679 (Geisinger Clinic); U01HG008680 (Columbia  
653 University Health Sciences); U01HG008684 (Children's Hospital of Philadelphia);  
654 U01HG008673 (Northwestern University); U01HG008701 (Vanderbilt University Medical  
655 Center serving as the Coordinating Center); U01HG008676 (Partners Healthcare/Broad  
656 Institute); U01HG008664 (Baylor College of Medicine); and U54MD007593 (Meharry Medical  
657 College).

## 658 **References**

- 660 1. Martin AR, Kanai M, Kamatani Y, Okada Y, Neale BM, Daly MJ. Clinical use of current  
661 polygenic risk scores may exacerbate health disparities. *Nat Genet.* 2019 Apr;51(4):584–91.
- 662 2. Wang Y, Guo J, Ni G, Yang J, Visscher PM, Yengo L. Theoretical and empirical  
663 quantification of the accuracy of polygenic scores in ancestry divergent populations. *Nat*  
664 *Commun.* 2020 Jul 31;11(1):3865.
- 665 3. Galinsky KJ, Reshef YA, Finucane HK, Loh PR, Zaitlen N, Patterson NJ, et al. Estimating  
666 cross-population genetic correlations of causal effect sizes. *Genet Epidemiol.* 2019  
667 Mar;43(2):180–8.
- 668 4. Shi H, Gazal S, Kanai M, Koch EM, Schoech AP, Siewert KM, et al. Population-specific  
669 causal disease effect sizes in functionally important regions impacted by selection. *Nat*  
670 *Commun.* 2021 Feb 17;12(1):1098.
- 671 5. Rask-Andersen M, Karlsson T, Ek WE, Johansson Å. Gene-environment interaction study  
672 for BMI reveals interactions between genetic factors and physical activity, alcohol  
673 consumption and socioeconomic status. *PLoS Genet.* 2017 Sep;13(9):e1006977.
- 674 6. Robinson MR, English G, Moser G, Lloyd-Jones LR, Triplett MA, Zhu Z, et al. Genotype-  
675 covariate interaction effects and the heritability of adult body mass index. *Nat Genet.* 2017  
676 Aug;49(8):1174–81.
- 677 7. Sulc J, Mounier N, Günther F, Winkler T, Wood AR, Frayling TM, et al. Quantification of  
678 the overall contribution of gene-environment interaction for obesity-related traits. *Nat*  
679 *Commun.* 2020 Mar 13;11(1):1385.
- 680 8. Justice AE, Winkler TW, Feitosa MF, Graff M, Fisher VA, Young K, et al. Genome-wide  
681 meta-analysis of 241,258 adults accounting for smoking behaviour identifies novel loci for  
682 obesity traits. *Nat Commun.* 2017 Apr 26;8:14977.
- 683 9. Helgeland Ø, Vaudel M, Juliusson PB, Lingaas Holmen O, Juodakis J, Bacelis J, et al.  
684 Genome-wide association study reveals dynamic role of genetic variation in infant and early  
685 childhood growth. *Nat Commun.* 2019 Oct 1;10(1):4448.

- 686 10. Vogelezang S, Bradfield JP, Ahluwalia TS, Curtin JA, Lakka TA, Grarup N, et al. Novel loci  
687 for childhood body mass index and shared heritability with adult cardiometabolic traits.  
688 PLoS Genet. 2020 Oct;16(10):e1008718.
- 689 11. Couto Alves A, De Silva NMG, Karhunen V, Sovio U, Das S, Taal HR, et al. GWAS on  
690 longitudinal growth traits reveals different genetic factors influencing infant, child, and adult  
691 BMI. Sci Adv. 2019 Sep;5(9):eaaw3095.
- 692 12. Choh AC, Lee M, Kent JW, Diego VP, Johnson W, Curran JE, et al. Gene-by-age effects on  
693 BMI from birth to adulthood: the Fels Longitudinal Study. Obes Silver Spring Md. 2014  
694 Mar;22(3):875–81.
- 695 13. Mostafavi H, Harpak A, Agarwal I, Conley D, Pritchard JK, Przeworski M. Variable  
696 prediction accuracy of polygenic scores within an ancestry group. eLife. 2020 Jan  
697 30;9:e48376.
- 698 14. Elks CE, den Hoed M, Zhao JH, Sharp SJ, Wareham NJ, Loos RJF, et al. Variability in the  
699 heritability of body mass index: a systematic review and meta-regression. Front Endocrinol.  
700 2012;3:29.
- 701 15. Bycroft C, Freeman C, Petkova D, Band G, Elliott LT, Sharp K, et al. The UK Biobank  
702 resource with deep phenotyping and genomic data. Nature. 2018 Oct;562(7726):203–9.
- 703 16. Stanaway IB, Hall TO, Rosenthal EA, Palmer M, Naranbhai V, Knevel R, et al. The  
704 eMERGE genotype set of 83,717 subjects imputed to ~40 million variants genome wide  
705 and association with the herpes zoster medical record phenotype. Genet Epidemiol. 2019  
706 Feb;43(1):63–81.
- 707 17. Kilpeläinen TO, Qi L, Brage S, Sharp SJ, Sonestedt E, Demerath E, et al. Physical activity  
708 attenuates the influence of FTO variants on obesity risk: a meta-analysis of 218,166 adults  
709 and 19,268 children. PLoS Med. 2011 Nov;8(11):e1001116.
- 710 18. Rampersaud E, Mitchell BD, Pollin TI, Fu M, Shen H, O’Connell JR, et al. Physical activity  
711 and the association of common FTO gene variants with body mass index and obesity. Arch  
712 Intern Med. 2008 Sep 8;168(16):1791–7.
- 713 19. Amin V, Dunn P, Spector T. Does education attenuate the genetic risk of obesity? Evidence  
714 from U.K. Twins. Econ Hum Biol. 2018 Sep;31:200–8.
- 715 20. Li Y, Cai T, Wang H, Guo G. Achieved educational attainment, inherited genetic  
716 endowment for education, and obesity. Biodemography Soc Biol. 2021 Jun;66(2):132–44.
- 717 21. Frank M, Dragano N, Arendt M, Forstner AJ, Nöthen MM, Moebus S, et al. A genetic sum  
718 score of risk alleles associated with body mass index interacts with socioeconomic position  
719 in the Heinz Nixdorf Recall Study. PloS One. 2019;14(8):e0221252.
- 720 22. Ge T, Chen CY, Neale BM, Sabuncu MR, Smoller JW. Phenome-wide heritability analysis  
721 of the UK Biobank. PLoS Genet. 2017 Apr;13(4):e1006711.



- 722 23. Min J, Chiu DT, Wang Y. Variation in the heritability of body mass index based on diverse  
723 twin studies: a systematic review. *Obes Rev Off J Int Assoc Study Obes*. 2013  
724 Nov;14(11):871–82.
- 725 24. Aschard H, Vilhjálmsson BJ, Joshi AD, Price AL, Kraft P. Adjusting for heritable covariates  
726 can bias effect estimates in genome-wide association studies. *Am J Hum Genet*. 2015 Feb  
727 5;96(2):329–39.
- 728 25. Robinson PN, Arteaga-Solis E, Baldock C, Collod-Bérout G, Booms P, De Paepe A, et al.  
729 The molecular genetics of Marfan syndrome and related disorders. *J Med Genet*. 2006  
730 Oct;43(10):769–87.
- 731 26. Zhang X, Lucas AM, Veturi Y, Drivas TG, Bone WP, Verma A, et al. Large-scale genomic  
732 analyses reveal insights into pleiotropy across circulatory system diseases and nervous  
733 system disorders. *Nat Commun*. 2022 Jun 14;13(1):3428.
- 734 27. Chang CC, Chow CC, Tellier LC, Vattikuti S, Purcell SM, Lee JJ. Second-generation  
735 PLINK: rising to the challenge of larger and richer datasets. *GigaScience*. 2015;4:7.
- 736 28. Banda Y, Kvale MN, Hoffmann TJ, Hesselson SE, Ranatunga D, Tang H, et al.  
737 Characterizing Race/Ethnicity and Genetic Ancestry for 100,000 Subjects in the Genetic  
738 Epidemiology Research on Adult Health and Aging (GERA) Cohort. *Genetics*. 2015  
739 Aug;200(4):1285–95.
- 740 29. Penn Medicine BioBank [Internet]. Available from: <https://pmbb.med.upenn.edu/>
- 741 30. Tyrrell J, Wood AR, Ames RM, Yaghootkar H, Beaumont RN, Jones SE, et al. Gene-  
742 obesogenic environment interactions in the UK Biobank study. *Int J Epidemiol*. 2017 Apr  
743 1;46(2):559–75.
- 744 31. Young AI, Wauthier F, Donnelly P. Multiple novel gene-by-environment interactions modify  
745 the effect of FTO variants on body mass index. *Nat Commun*. 2016 Sep 6;7:12724.
- 746 32. Winkler TW, Justice AE, Graff M, Barata L, Feitosa MF, Chu S, et al. The Influence of Age  
747 and Sex on Genetic Associations with Adult Body Size and Shape: A Large-Scale Genome-  
748 Wide Interaction Study. *PLoS Genet*. 2015 Oct;11(10):e1005378.
- 749 33. Ruan Y, Lin YF, Feng YCA, Chen CY, Lam M, Guo Z, et al. Improving polygenic  
750 prediction in ancestrally diverse populations. *Nat Genet*. 2022 May;54(5):573–80.
- 751 34. Locke AE, Kahali B, Berndt SI, Justice AE, Pers TH, Day FR, et al. Genetic studies of body  
752 mass index yield new insights for obesity biology. *Nature*. 2015 Feb 12;518(7538):197–206.
- 753 35. Ng MCY, Graff M, Lu Y, Justice AE, Mudgal P, Liu CT, et al. Discovery and fine-mapping  
754 of adiposity loci using high density imputation of genome-wide association studies in  
755 individuals of African ancestry: African Ancestry Anthropometry Genetics Consortium.  
756 *PLoS Genet*. 2017 Apr;13(4):e1006719.

- 757 36. Sakaue S, Kanai M, Tanigawa Y, Karjalainen J, Kurki M, Koshihara S, et al. A cross-  
758 population atlas of genetic associations for 220 human phenotypes. *Nat Genet.* 2021  
759 Oct;53(10):1415–24.
- 760 37. Kerin M, Marchini J. Inferring Gene-by-Environment Interactions with a Bayesian Whole-  
761 Genome Regression Model. *Am J Hum Genet.* 2020 Oct 1;107(4):698–713.
- 762 38. Vanderweele TJ, Ko YA, Mukherjee B. Environmental confounding in gene-environment  
763 interaction studies. *Am J Epidemiol.* 2013 Jul 1;178(1):144–52.
- 764 39. Ge T, Chen CY, Ni Y, Feng YCA, Smoller JW. Polygenic prediction via Bayesian regression  
765 and continuous shrinkage priors. *Nat Commun.* 2019 Apr 16;10(1):1776.
- 766 40. Afshartous D, Preston RA. Key Results of Interaction Models with Centering. *J Stat Educ.*  
767 2011 Nov;19(3):1.

768  
769  
770  
771  
772  
773  
774  
775  
776  
777  
778  
779  
780  
781  
782  
783  
784  
785  
786  
787  
788  
789  
790  
791

**Figures**

792

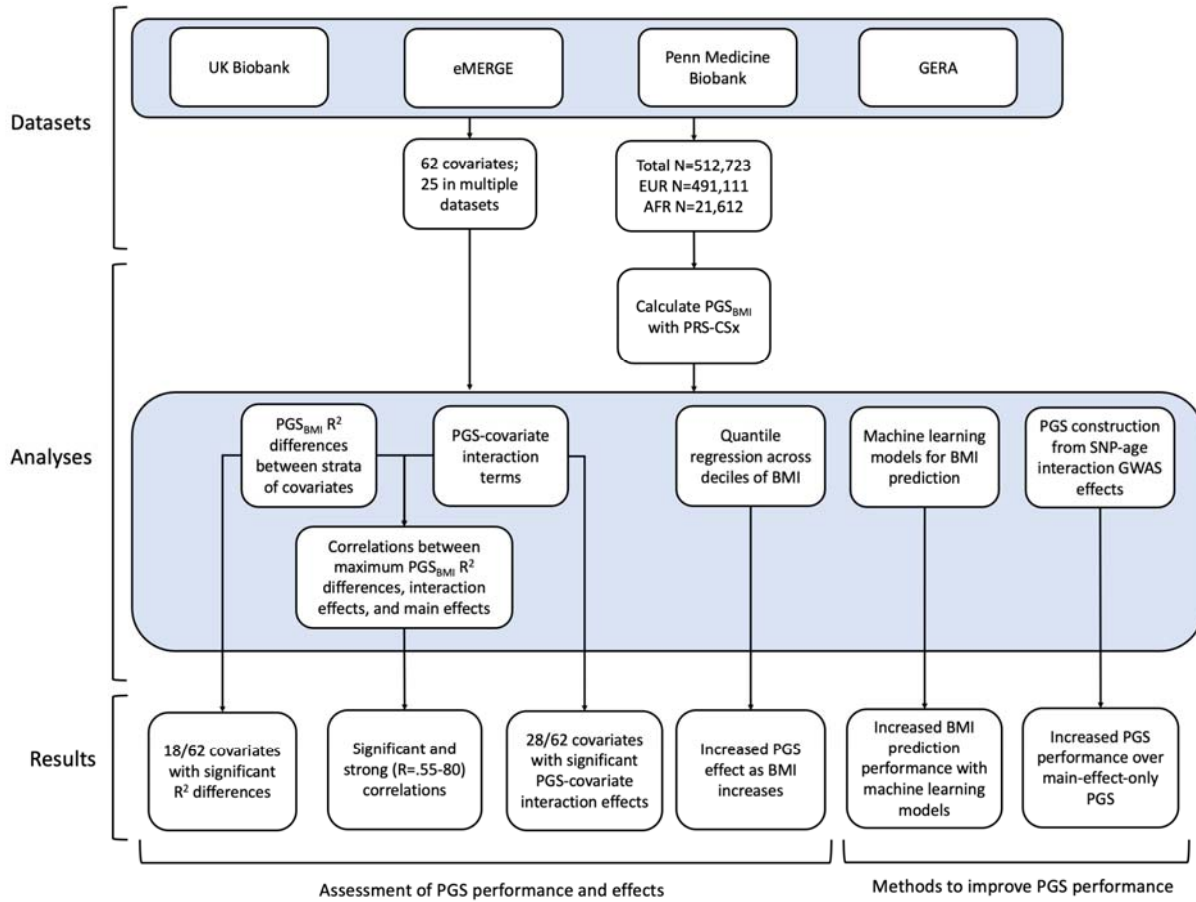

793  
794  
795  
796  
797  
798  
799  
800  
801  
802  
803  
804  
805

Figure 1. A flowchart of the project.

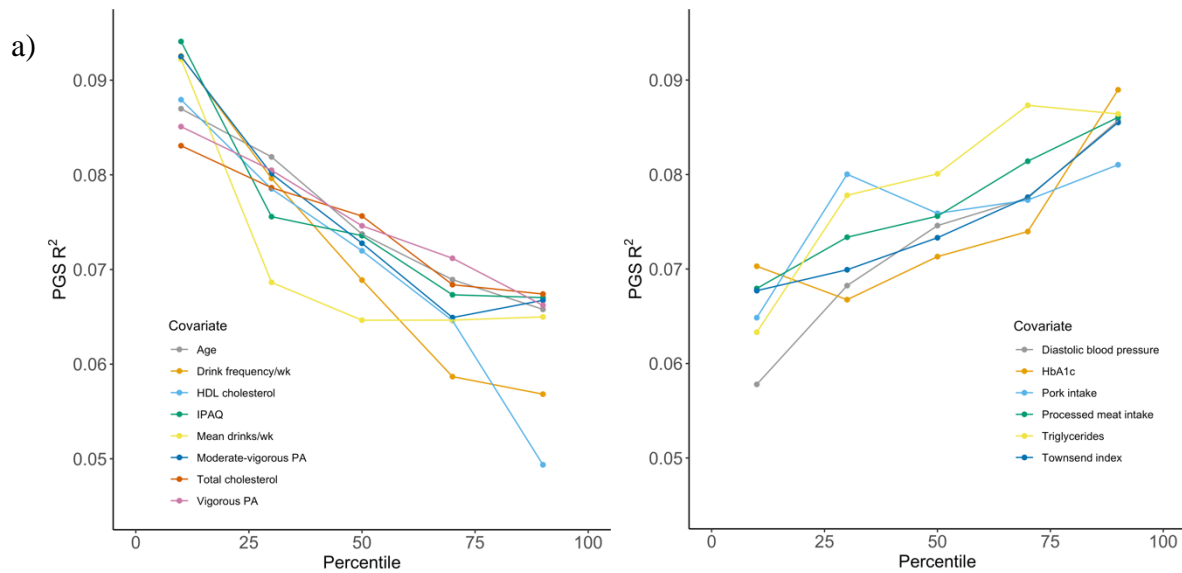

806  
807  
808

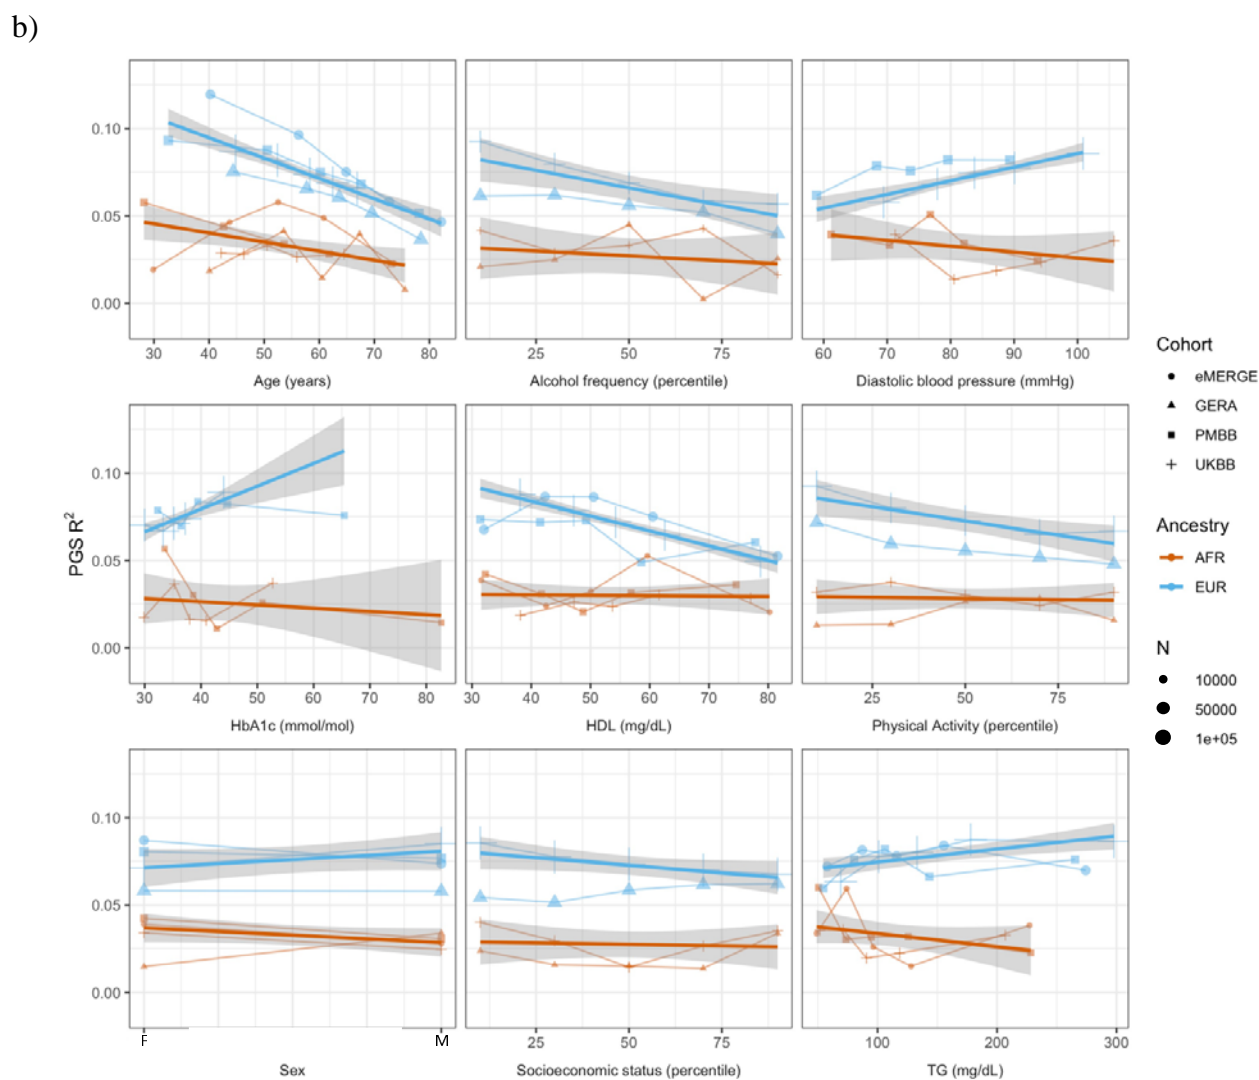

809  
810



811 Figure 2. PGS  $R^2$  stratified by quintiles for quantitative variables and by binary variables. a)  
812 Continuous covariates with significant ( $p < 8.1 \times 10^{-4}$ )  $R^2$  differences across quintiles in UKBB  
813 EUR. Pork and processed meat consumption per week were excluded from this plot in favor of  
814 pork and processed meat intake. b) Covariates with significant differences that were available in  
815 multiple cohorts. When traits had the same or directly comparable units between cohorts we  
816 show the actual trait values (and show percentiles for physical activity, alcohol intake frequency,  
817 and socioeconomic status, which had slightly differing phenotype definitions across cohorts)  
818 plotted on x-axis. Townsend index and income were used as variables for socioeconomic status  
819 UKBB and GERA, respectively. Note that the sign for Townsend index was reversed, since  
820 increasing Townsend index is lower socioeconomic status, while increasing income is higher  
821 socioeconomic status. Abbreviations: physical activity (PA), International Physical Activity  
822 Questionnaire (IPAQ).  
823  
824  
825  
826  
827  
828  
829  
830

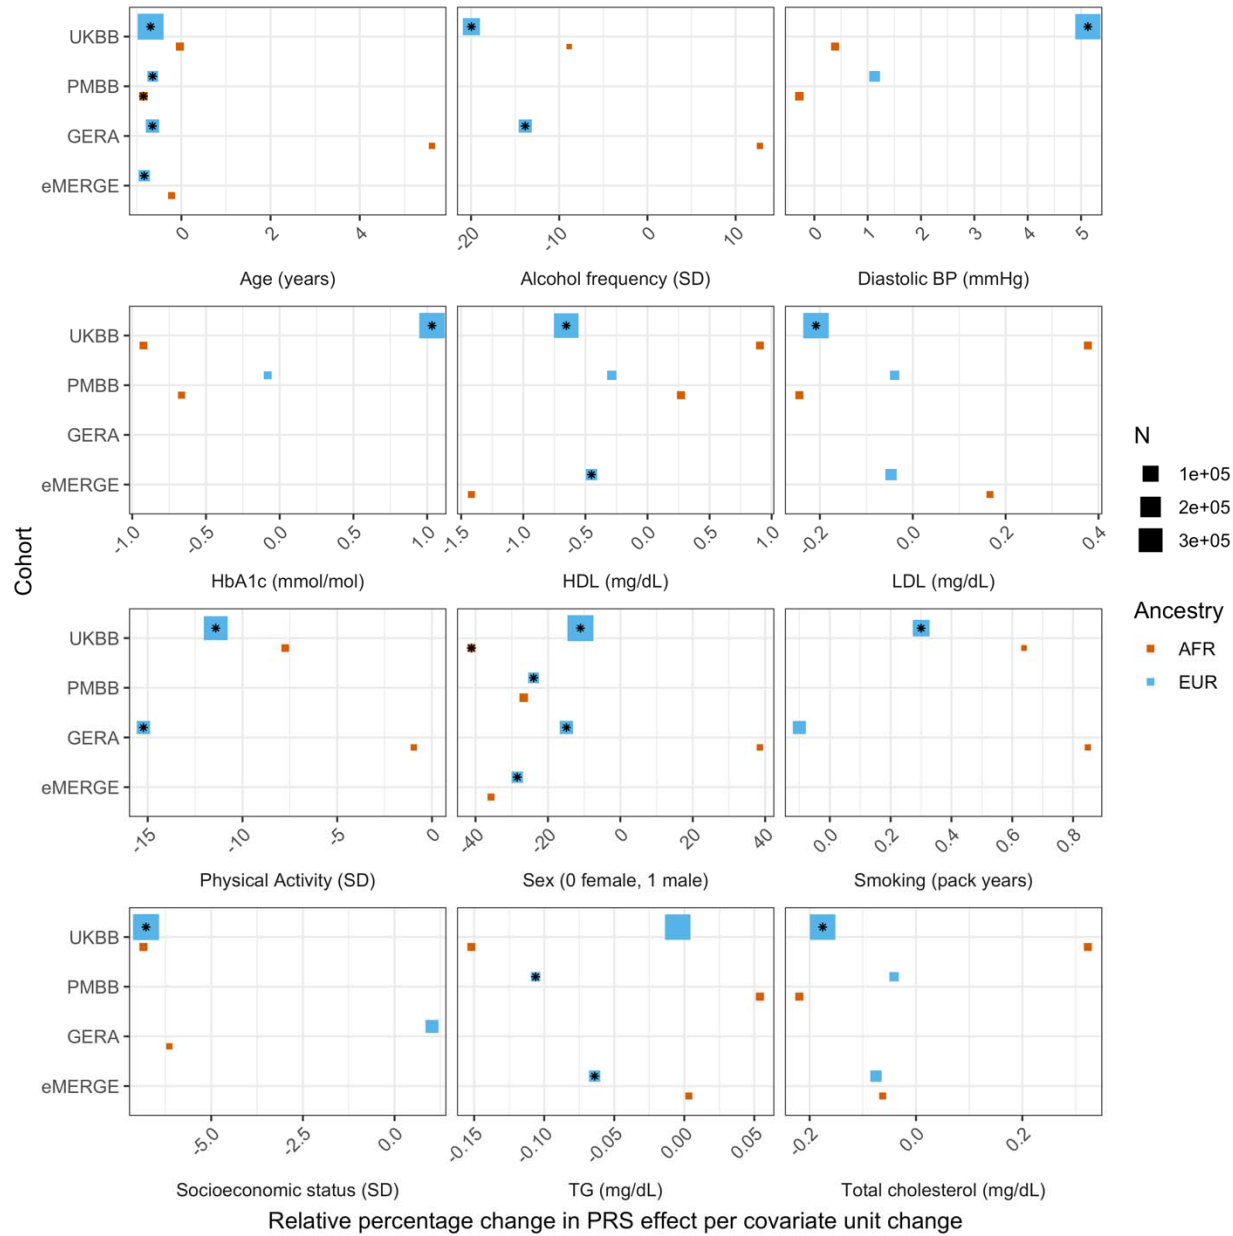

831  
832  
833  
834  
835  
836  
837  
838  
839  
840  
841  
842  
843  
844

Figure 3. Relative percentage changes in PGS effect per unit change in covariate, for covariates that significantly changed PGS effect (i.e., significant interaction beta at Bonferroni  $p < 8.1 \times 10^{-4}$  – denoted by asterisks) and were present in multiple cohorts and ancestries. Same covariate groupings and transformations were performed as in Figure 1. Similarly, actual values were used when variables had comparable units across cohorts, and standard deviations (SD) used otherwise.

845

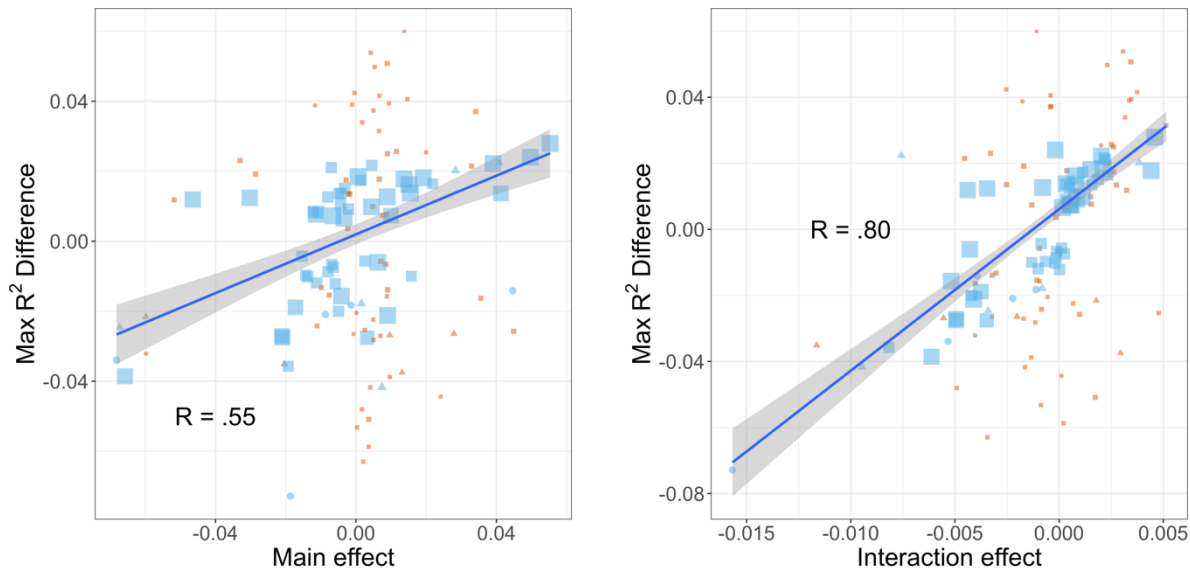

846

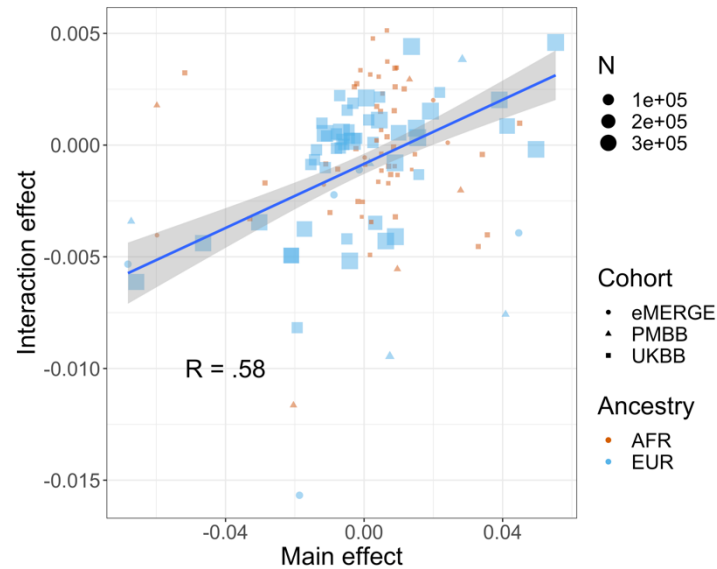

847

848

849 Figure 4. Relationships (Pearson correlations weighted by sample size) between maximum R<sup>2</sup>  
850 differences across strata, main effects of covariate on log(BMI), and PGS-covariate interaction  
851 effects on log(BMI). Main effect units are in standard deviations, interaction effect units are in  
852 PGS standard deviations multiplied by covariate standard deviations. Only continuous variables  
853 are plotted and modeled. GERA was excluded due to slightly different phenotype definitions.

854

855

856

857

858

859

860

861

862

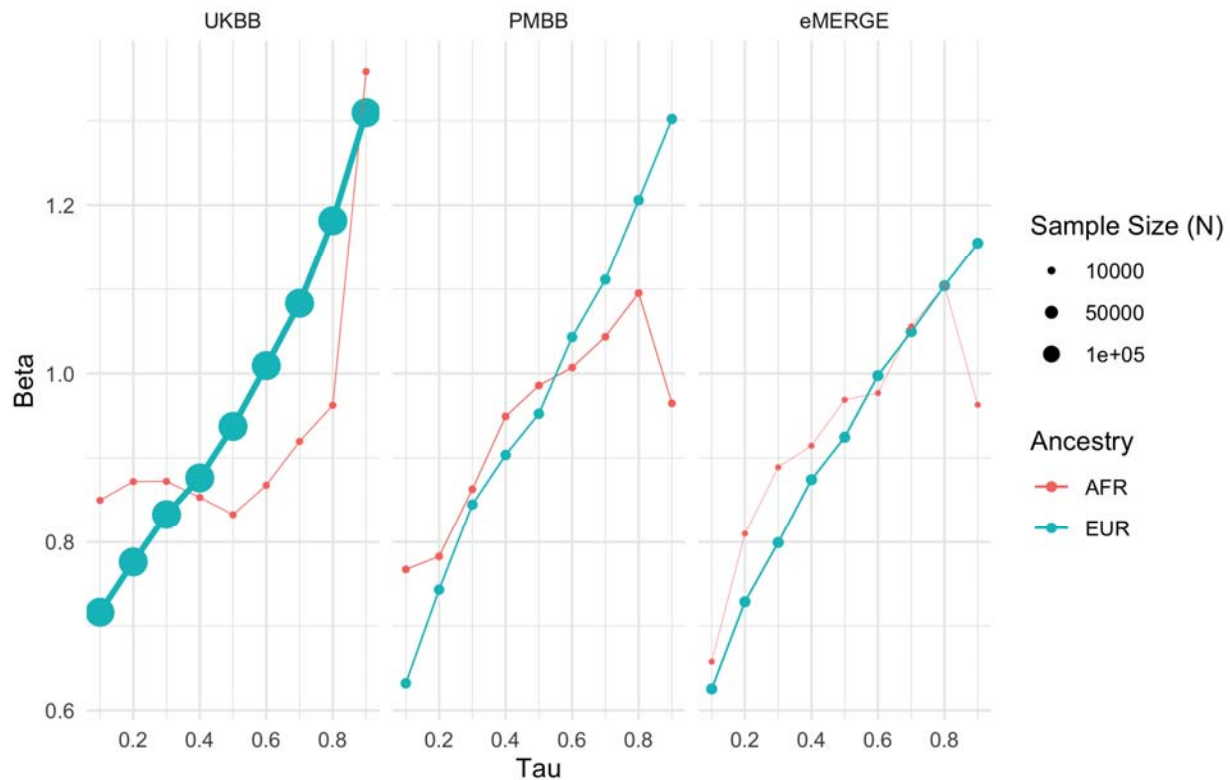

863

864

865

866

867

868

869

870

871

872

873

874

Figure 5. Quantile regression effects of  $PGS_{BMI}$  (in units of  $\log(BMI)$ ) on  $\log(BMI)$  at each decile of BMI in each cohort and ancestry. The effect of  $PGS_{BMI}$  increases as BMI itself increases, suggesting that no individual covariate-PGS interaction is responsible for the nonlinear effect of  $PGS_{BMI}$ .



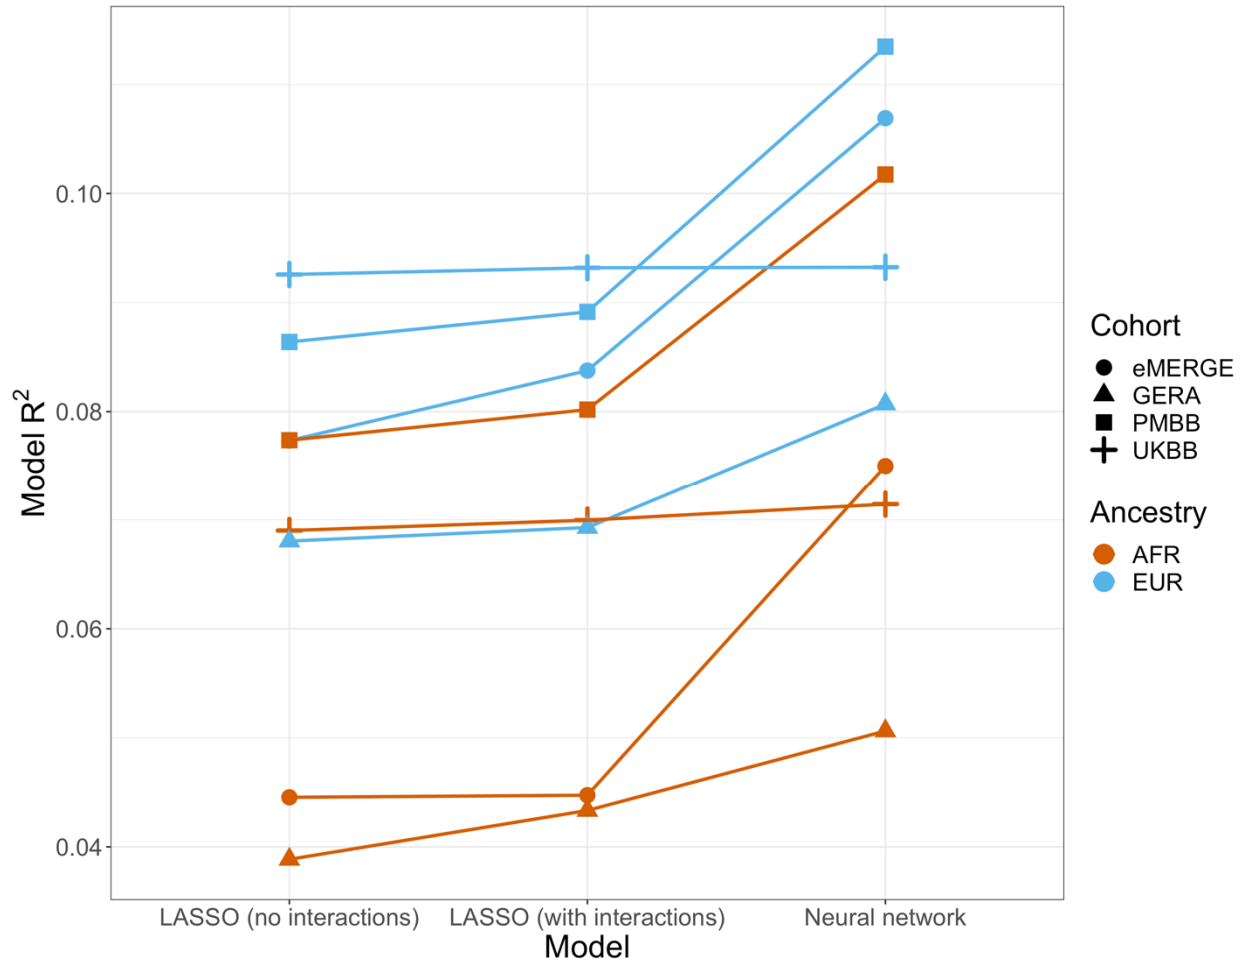

875  
876  
877  
878  
879  
880  
881  
882  
883  
884  
885  
886  
887  
888  
889  
890  
891  
892  
893  
894  
895

Figure 6. Model R<sup>2</sup> from different machine learning models across cohorts and ancestries using age and gender as covariates (along with PGS<sub>BMI</sub> and PCs 1-5). Across all cohorts and ancestries, LASSO with PGS-age and PGS-gender interaction terms had better average 10-fold cross-validation R<sup>2</sup> than LASSO without interaction terms, while neural networks outperformed LASSO models.

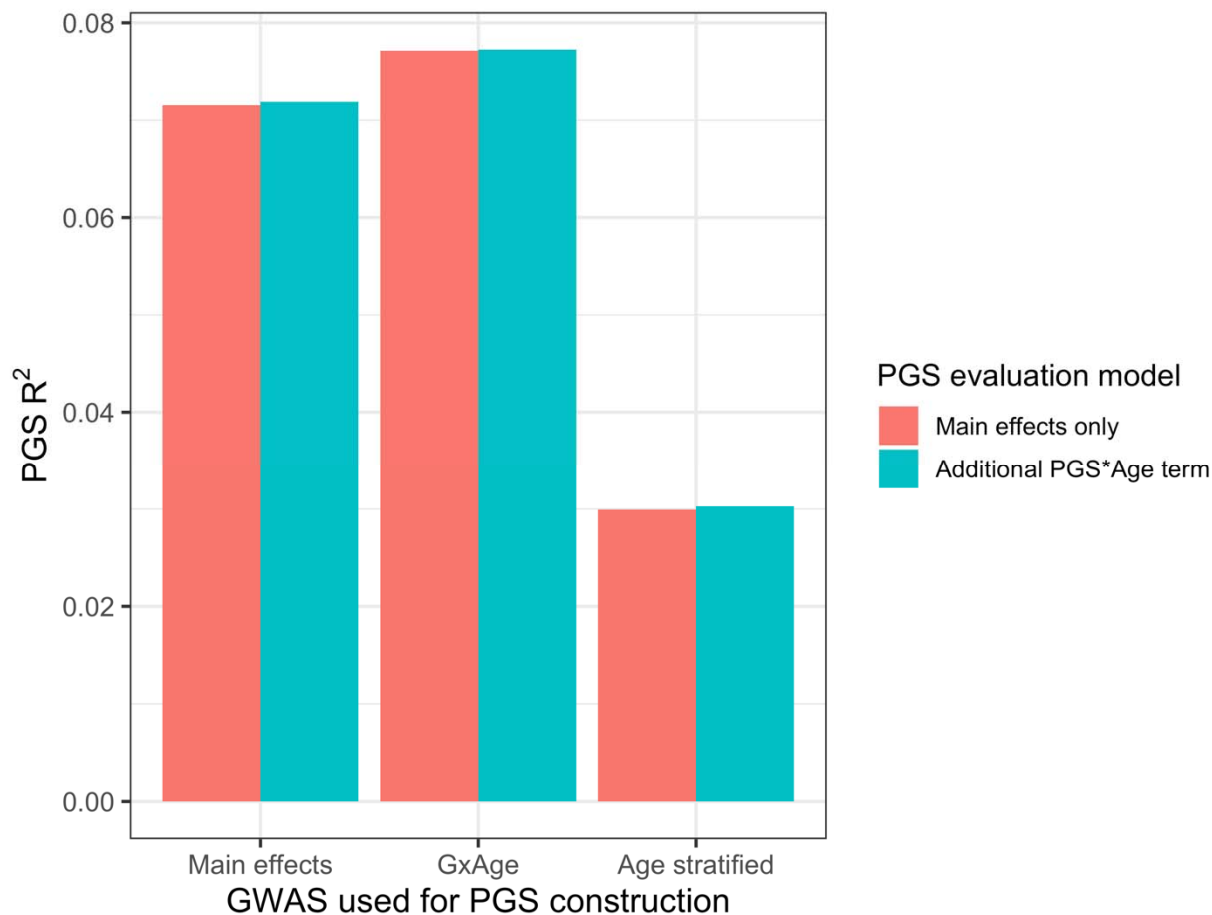

896  
897 Figure 7. PGS R<sup>2</sup> based on three sets of GWAS setups. “Main effects” were from a typical main  
898 effect GWAS, “GxAge” effects were from a GWAS with a SNP-age interaction term, and “Age  
899 stratified” GWAS had main effects only but were conducted in four age quartiles. PGS R<sup>2</sup> was  
900 evaluated using two models: one with main effects only, and one with an additional PGS\*Age  
901 interaction term.

902  
903  
904  
905  
906  
907  
908  
909  
910  
911  
912  
913  
914  
915  
916  
917

918 Supplemental Figures:

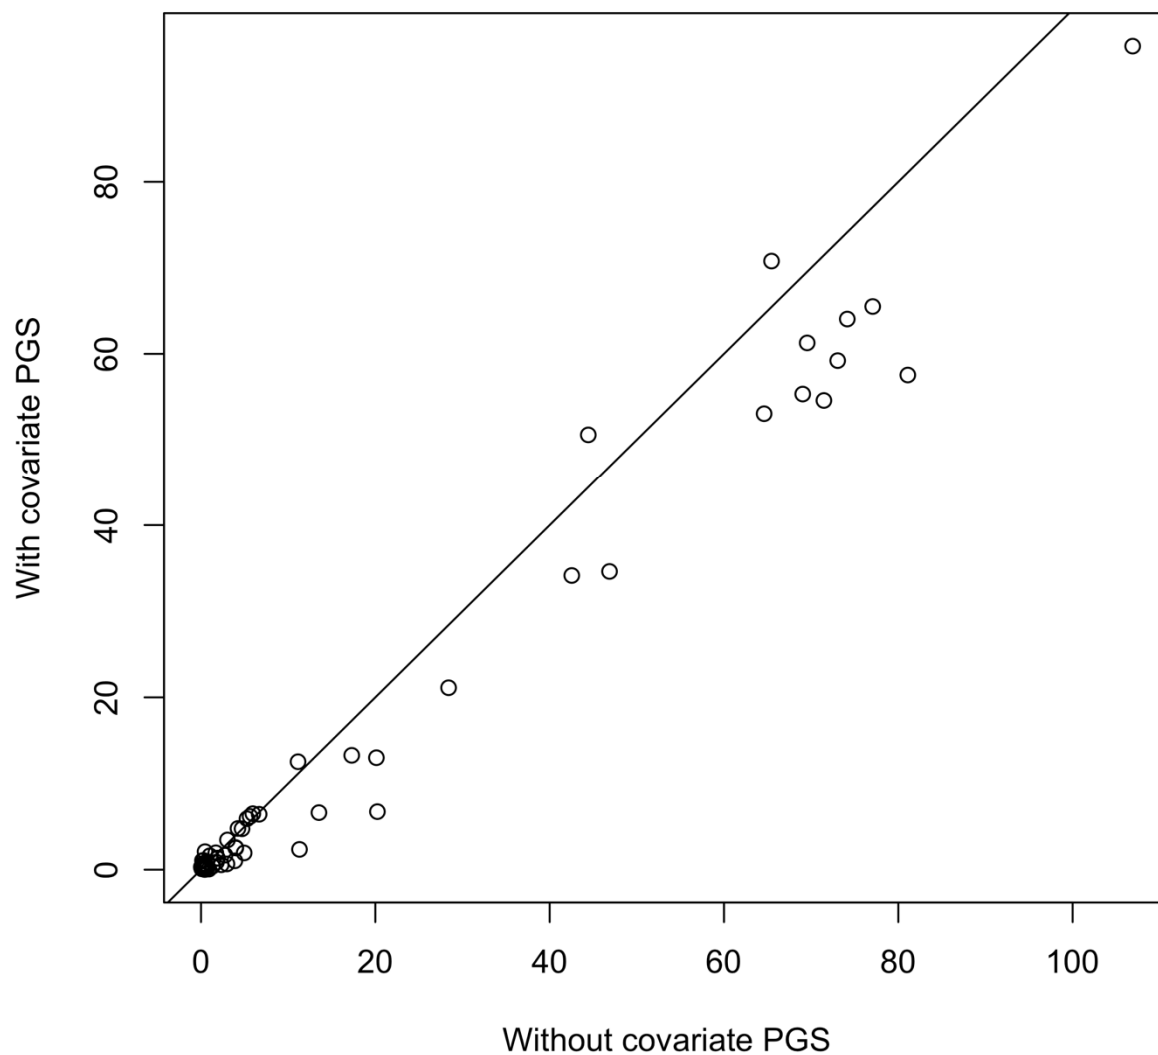

919  
920 S Figure 1. PGS-covariate interaction term  $-\log_{10}(\text{p-values})$  in UKBB EUR, with and without  
921 including the covariate PGS in the model – the mean  $-\log_{10}(\text{p})$  is reduced from 18.0899 to  
922 14.97072 with their inclusions. Note age and sex PGS were not calculated, and their interaction  
923 p-values are excluded from this figure.

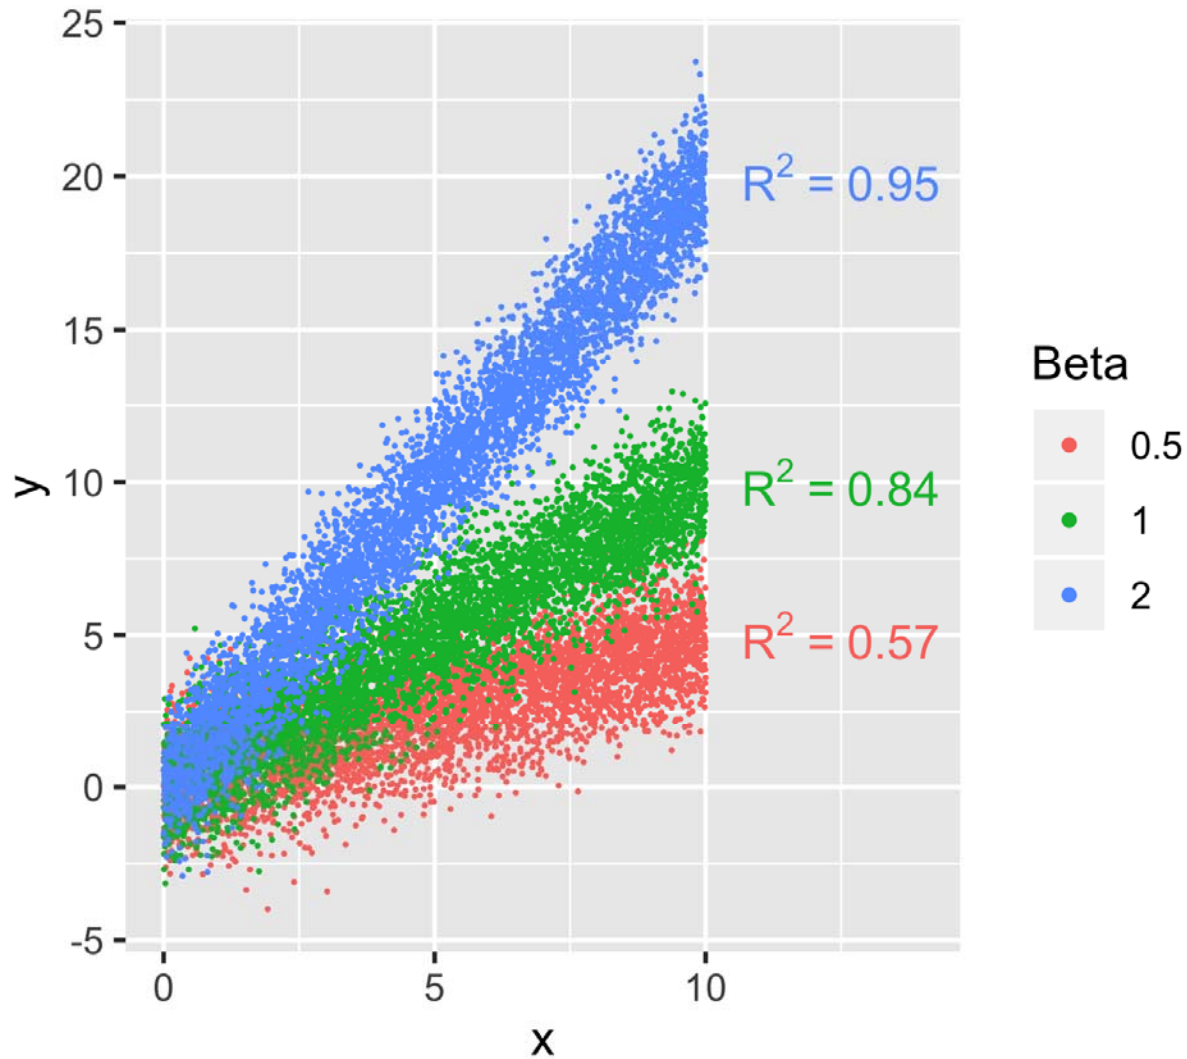

924  
925 S Figure 2. Three sets of simulated data with varying regression line slopes, showing how model  
926  $R^2$  changes when regression line slope changes, all else being equal. Residuals were sampled  
927 from a normal distribution (mean=0, sigma= $\sqrt{\pi/2}$ ) to give mean squared error=1. 5,000 x-  
928 values were sampled for each line, uniformly distributed from 0-10. Despite having the same  
929 mean squared error, model  $R^2$  increases as beta increases.  
930

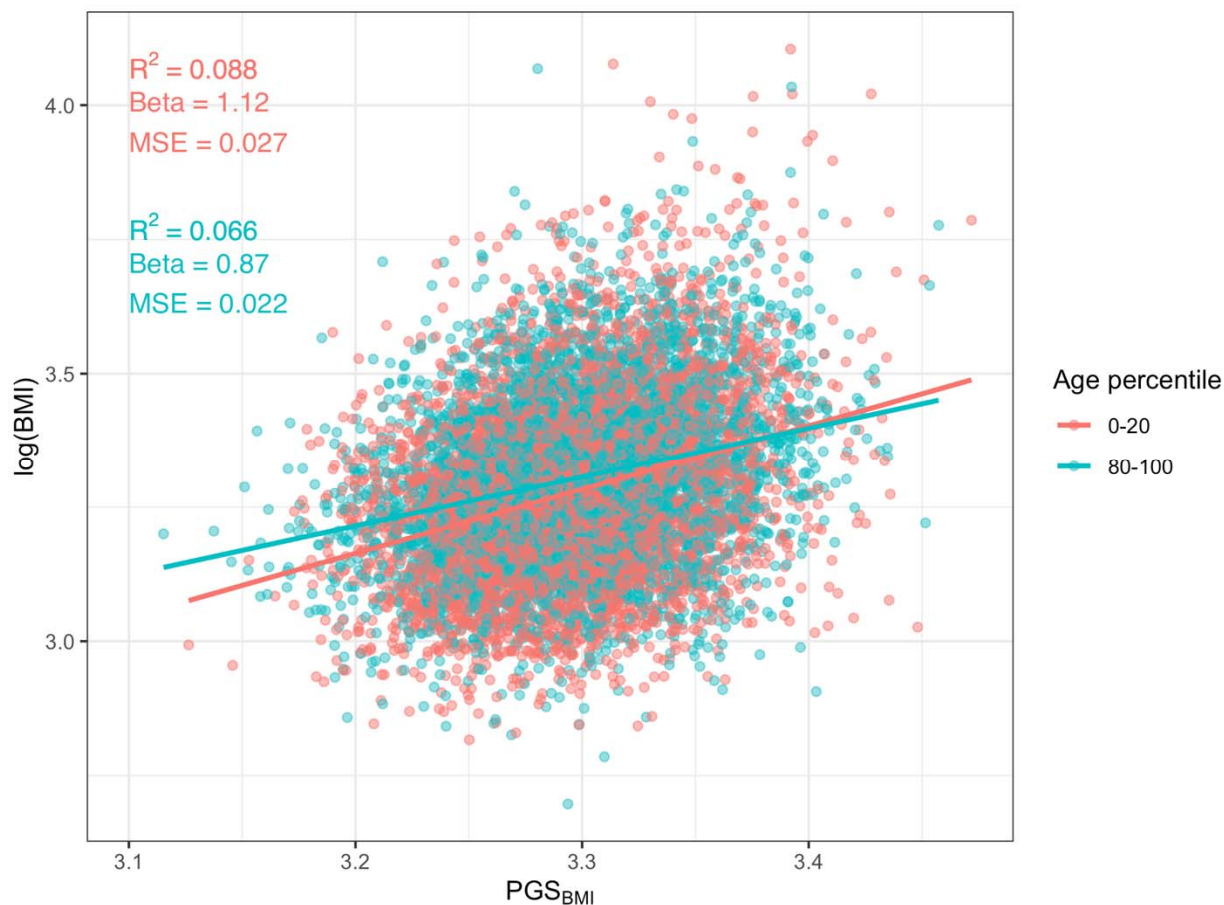

931  
 932 S Figure 3. Univariable association of  $PGS_{BMI}$  and  $\log(BMI)$  in European UKBB, separately for  
 933 the bottom and top quintiles of age.  $R^2$  is higher in younger individuals, which is partially a  
 934 consequence of the larger effect (as shown in S Figure 2), despite the mean squared error  
 935 actually being higher.

936  
 937 **Table**

| Variable type | Covariate             | % change in $\beta_{PGS}$ per covariate unit change | Interaction P          | $R^2$ increase with interaction term | N      |
|---------------|-----------------------|-----------------------------------------------------|------------------------|--------------------------------------|--------|
| Continuous    | HDL cholesterol       | -15.29                                              | $1.71 \times 10^{-96}$ | 0.0012                               | 328719 |
|               | Total cholesterol     | -12.70                                              | $1.64 \times 10^{-71}$ | 0.00082                              | 359221 |
|               | IPAQ                  | -12.50                                              | $3.11 \times 10^{-66}$ | 0.001                                | 304951 |
|               | Moderate-vigorous PA  | -11.41                                              | $8.92 \times 10^{-65}$ | 0.001                                | 304951 |
|               | Diastolic BP          | 10.84                                               | $6.06 \times 10^{-60}$ | 0.0007                               | 352804 |
|               | Townsend Index        | 6.78                                                | $2.86 \times 10^{-58}$ | 0.00089                              | 376283 |
|               | Age                   | -9.02                                               | $3.60 \times 10^{-57}$ | 0.00061                              | 376729 |
|               | FVC                   | -9.66                                               | $4.69 \times 10^{-56}$ | 0.0008                               | 343467 |
|               | Drink frequency/wk    | -19.96                                              | $2.62 \times 10^{-55}$ | 0.0024                               | 122281 |
|               | LDL cholesterol       | -9.86                                               | $2.63 \times 10^{-51}$ | 0.00058                              | 358556 |
|               | N days vigorous PA/wk | -9.37                                               | $2.42 \times 10^{-35}$ | 0.0007                               | 299963 |



|        |                          |        |                        |          |        |
|--------|--------------------------|--------|------------------------|----------|--------|
|        | FEV1                     | -7.38  | $7.15 \times 10^{-35}$ | 0.0005   | 343544 |
|        | Mean alcohol consumption | -7.38  | $7.65 \times 10^{-22}$ | 0.00113  | 126756 |
|        | HbA1c                    | 4.63   | $5.37 \times 10^{-14}$ | 0.0002   | 358798 |
|        | Mean drinks/wk           | -7.66  | $1.01 \times 10^{-13}$ | 0.0008   | 112204 |
|        | Water intake             | 4.60   | $2.97 \times 10^{-13}$ | 0.00014  | 347472 |
|        | Processed meat intake    | 3.70   | $2.38 \times 10^{-7}$  | 0.0002   | 376205 |
|        | Starch mean              | 5.51   | $3.15 \times 10^{-7}$  | 0.00018  | 128346 |
|        | Smoking pack years       | 4.78   | $3.68 \times 10^{-7}$  | 0.0002   | 114135 |
|        | Protein mean             | 4.82   | $6.52 \times 10^{-7}$  | 0.00018  | 128181 |
|        | Saturated fat mean       | 4.92   | $1.23 \times 10^{-6}$  | 0.00017  | 127899 |
|        | Fat mean                 | 4.40   | $1.64 \times 10^{-5}$  | 0.00013  | 128092 |
|        | Saturated fat grams/wk   | 2.46   | $1.79 \times 10^{-5}$  | 4.00E-05 | 364629 |
|        | Retinol mean             | 3.77   | $3.54 \times 10^{-4}$  | 9.00E-05 | 126029 |
| Binary | IPAQ                     | -12.68 | $5.30 \times 10^{-62}$ | 0.0009   | 304951 |
|        | Vigorous PA/wk           | -20.55 | $9.07 \times 10^{-54}$ | 0.0009   | 304951 |
|        | Sex                      | -11.02 | $1.41 \times 10^{-24}$ | 0.00025  | 376729 |
|        | Diabetes                 | 27.19  | $1.83 \times 10^{-7}$  | 0.0004   | 375903 |

938

939 Table 1. Model descriptive statistics on 28 of 62 covariates, which have significant ( $p < .05/62$ )  
 940 PGS-covariate interaction terms, in UKBB EUR. The third column is the percentage change in  
 941 PGS effect per unit change (standard deviations for continuous variables, binary variables  
 942 encoded as 0 or 1) in covariate. The fifth column is the increase in model  $R^2$  with a PGS-  
 943 covariate interaction term versus a main effects only model. Abbreviations: blood pressure (BP),  
 944 physical activity (PA), forced vital capacity (FVC), forced expiratory volume in 1-second  
 945 (FEV1), International Physical Activity Questionnaire (IPAQ).
