# Supplementary material for: Risk factors affecting polygenic score performance across diverse cohorts
Source: PubMed Central journal article supplement (PMC11030495; doi:10.1101/2023.05.10.23289777), 2024-04-10
Supplement: NIHPP2023.05.10.23289777v2-supplement-2.pdf [file NIHPP2023.05.10.23289777v2-supplement-2.pdf]

918 Supplemental Figures:

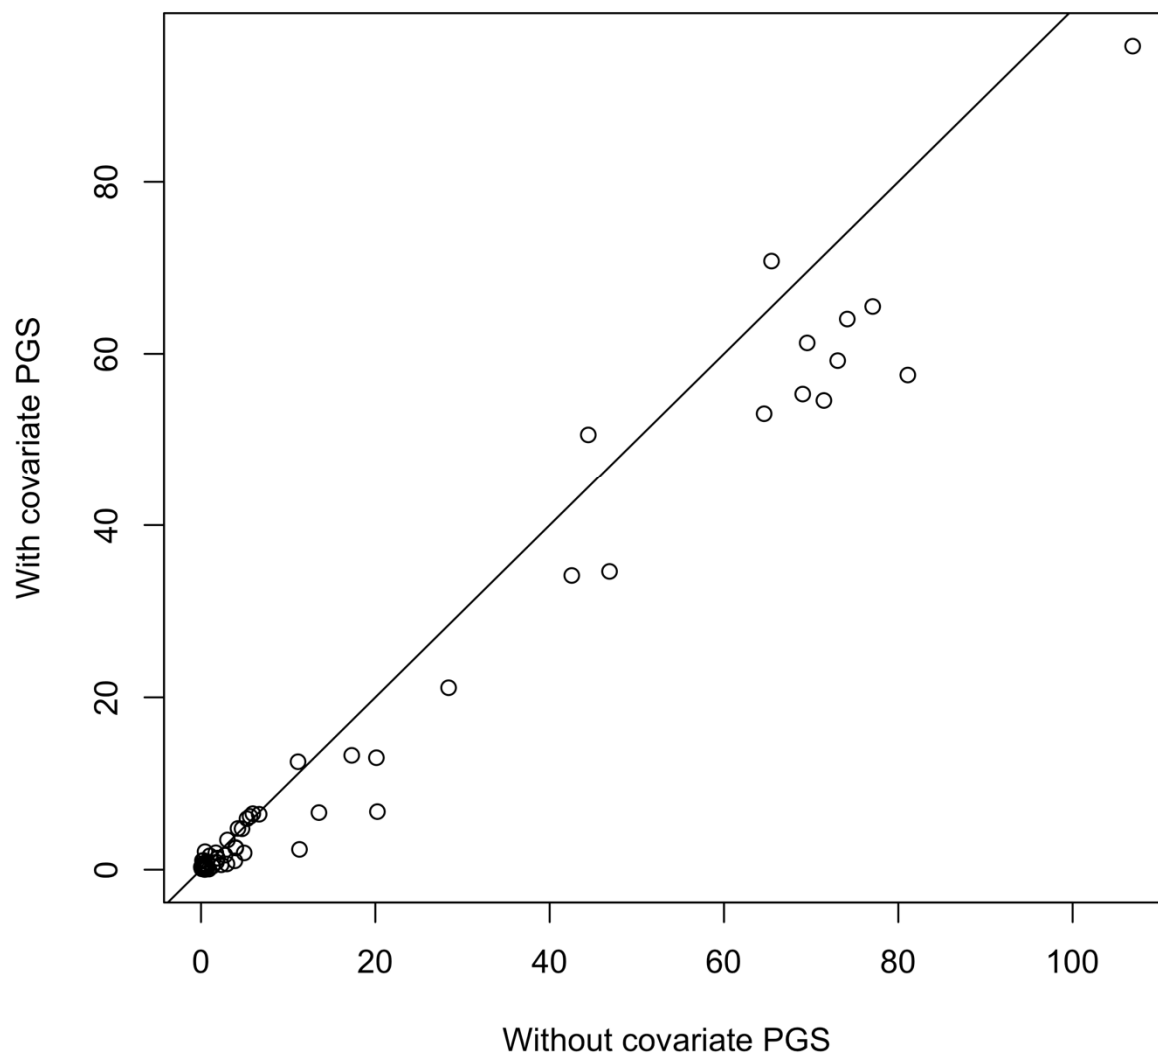

919  
920 S Figure 1. PGS-covariate interaction term  $-\log_{10}(\text{p-values})$  in UKBB EUR, with and without  
921 including the covariate PGS in the model – the mean  $-\log_{10}(\text{p})$  is reduced from 18.0899 to  
922 14.97072 with their inclusions. Note age and sex PGS were not calculated, and their interaction  
923 p-values are excluded from this figure.

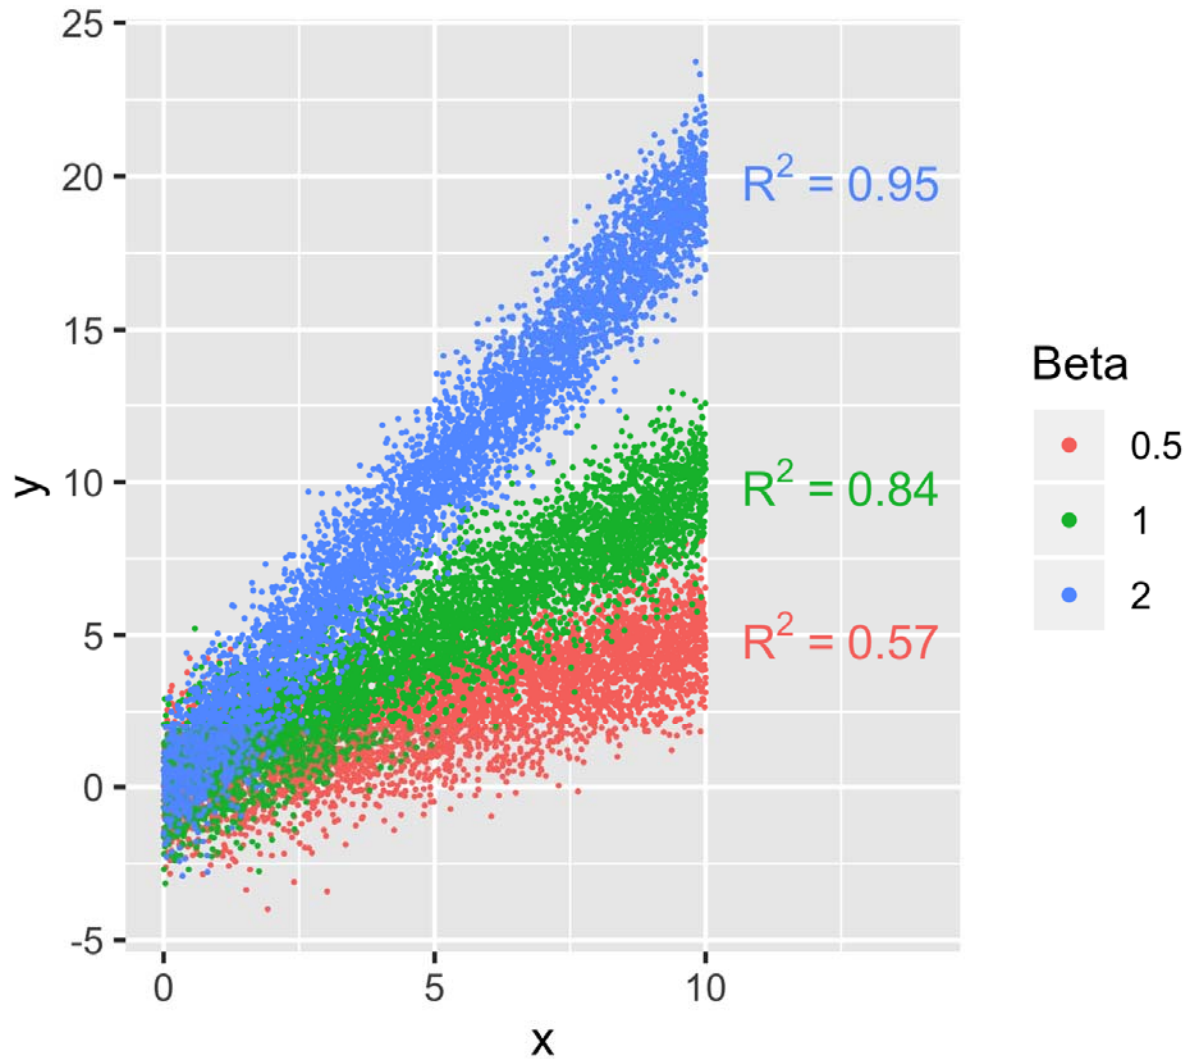

924  
925 S Figure 2. Three sets of simulated data with varying regression line slopes, showing how model  
926  $R^2$  changes when regression line slope changes, all else being equal. Residuals were sampled  
927 from a normal distribution (mean=0, sigma=sqrt( $\pi/2$ )) to give mean squared error=1. 5,000 x-  
928 values were sampled for each line, uniformly distributed from 0-10. Despite having the same  
929 mean squared error, model  $R^2$  increases as beta increases.  
930

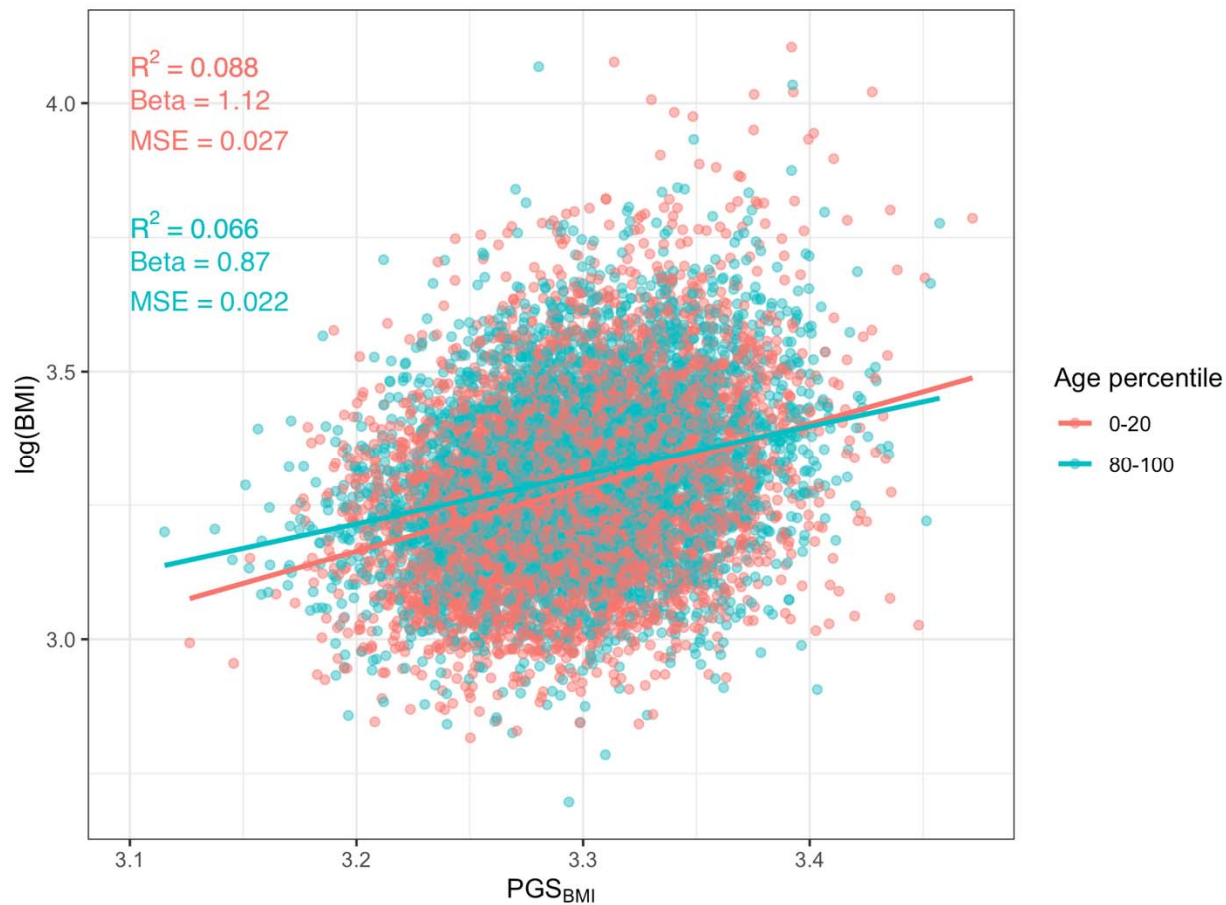

931  
932 S Figure 3. Univariable association of  $\text{PGS}_{\text{BMI}}$  and  $\log(\text{BMI})$  in European UKBB, separately for  
933 the bottom and top quintiles of age.  $R^2$  is higher in younger individuals, which is partially a  
934 consequence of the larger effect (as shown in S Figure 2), despite the mean squared error  
935 actually being higher.  
936
